1 **Sensitive quantitative and rapid immunochromatographic**  
2 **diagnosis of clinical samples by scanning electron microscopy -**  
3 **preparing for future outbreaks**

4

5 Running title: Immunochromatographic diagnosis of disease by SEM

6

7 Hideya Kawasaki<sup>\*a</sup>, Hiromi Suzuki<sup>a</sup>, Masato Maekawa<sup>b</sup>, Takahiko Hariyama<sup>\*a</sup>

8

9 <sup>a</sup> Institute for NanoSuit Research, Preeminent Medical Photonics Education &  
10 Research Center, Hamamatsu University School of Medicine, Hamamatsu, Japan

11 <sup>b</sup> Department of Laboratory Medicine, Hamamatsu University School of Medicine,  
12 Hamamatsu, Japan

13

14 \* Corresponding authors: Hideya Kawasaki, Takahiko Hariyama

15 **Email:** gloria@hama-med.ac.jp, hariyama@hama-med.ac.jp

16 ORCID account: 0000-0001-8923-7722, 0000-0001-9623-1011

17

18 **Author Contributions:** H.K. designed research; H.K., H.S., performed research;  
19 H.K. M.M., analyzed data; and H.K., T.H. wrote the paper.

20 **Abbreviations:** EM, Electron microscopy; LAMP, loop-mediated isothermal  
21 amplification; SEM, scanning electron microscope; GNP, gold nanoparticles;  
22 INSM, immunochromatography-NanoSuit<sup>®</sup> method; PCR, polymerase chain  
23 reaction; rRT-PCR, real-time reverse transcription-polymerase chain reaction, IgG,  
24 immunoglobulin G; IgM, immunoglobulin M

25

## 26 **Abstract**

27 **Background:** As pathogens such as influenza virus and severe acute respiratory  
28 syndrome coronavirus 2 (SARS-CoV-2) can easily cause pandemics, rapid  
29 diagnostic tests are crucial for implementing efficient quarantine measures,  
30 providing effective treatments to patients, and preventing or containing a pandemic  
31 infection. Here, we developed the immunochromatography-NanoSuit<sup>®</sup> method, an  
32 improved immunochromatography method combined with a conventional scanning  
33 electron microscope (SEM), which enables observation of immunocomplexes  
34 labeled with a colloidal metal.

35 **Methods and Findings:** The detection ability of our method is comparable to that  
36 of real-time reverse transcription-polymerase chain reaction and the detection time  
37 is approximately 15 min. Our new immunochromatography-NanoSuit<sup>®</sup> method

38 suppresses cellulose deformity and makes it possible to easily focus and acquire  
39 high-resolution images of gold/platinum labeled immunocomplexes of viruses such  
40 as influenza A, without the need for conductive treatment as with conventional  
41 SEM. Electron microscopy (EM)-based diagnosis of influenza A exhibited 94%  
42 clinical sensitivity (29/31) (95% confidence interval [95%CI]: 78.58–99.21%) and  
43 100% clinical specificity (95%CI: 97.80–100%). EM-based diagnosis was  
44 significantly more sensitive (71.2%) than macroscopic diagnosis (14.3%),  
45 especially in the lower influenza A-RNA copy number group. The detection ability  
46 of our method is comparable to that of real-time reverse transcription-polymerase  
47 chain reaction. **Conclusions:** This simple and highly sensitive quantitative  
48 analysis method involving immunochromatography can be utilized to diagnose  
49 various infections in humans and livestock, including highly infectious diseases  
50 such as COVID-19.

51

## 52 **Introduction**

53 Infections are major threats to humanity. The novel influenza A (H1N1) pdm09 was  
54 declared a pandemic in 2009 [1], and the current 2020 severe acute respiratory  
55 syndrome coronavirus 2 (SARS-CoV-2) pandemic has had a devastating impact  
56 on human health and the world economy. The following factors are crucial for

57 reducing the effects of these infections: 1: delayed invasion of infection into the  
58 country because of border measures and quarantine, 2: early containment  
59 strategies, 3: early diagnosis enabling appropriate treatment, and 4:  
60 broad antibody (IgM, IgG) and/or antigen testing against the virus to assess the  
61 spread of the virus. Therefore, rapid diagnostic tests are crucial for disease  
62 prevention, treatment, and pandemic containment [2]. Although real-time reverse  
63 transcription-polymerase chain reaction (rRT-PCR) is a sensitive method, it is time-  
64 consuming, costly, and requires special equipment with professional expertise and  
65 high-quality samples. For point-of-care testing, immunochromatography is easier  
66 to perform and useful for prompt disease detection, but its sensitivity and specificity  
67 are lower than those of rRT-PCR. However, improved specificity has been  
68 achieved by using lateral flow biosensors (LFBs) with micro- and nano-materials  
69 [3]. Signal readouts based on color, electrochemical signals, magnetic properties,  
70 luminescent, and surface-enhanced Raman spectroscopy have been integrated  
71 with LFBs for quantification analyses [3,4]. Nevertheless, these nanoparticle  
72 sensing methods are indirect. Direct observation of metal nanoparticles by electron  
73 microscopy (EM) for clinical use has not been reported because of the complexity  
74 of sample preparation and conventional EM operation. We recently reported a  
75 method for evaluating multicellular organisms in high vacuum of an EM by  
76 encasing them in a thin, vacuum-proof suit, the 'NanoSuit<sup>®</sup>' [5], which can impart

77 conductivity to a wet sample to avoid electron charges. Here, we combined the  
78 NanoSuit<sup>®</sup> method with immunochromatography. The new  
79 immunochromatography-NanoSuit<sup>®</sup> method (INSM) suppresses the deformity of  
80 the immunochromatography substrate such as cellulose, which causes blurring of  
81 particle images, and enables easy focus and acquisition of high-resolution images  
82 without the need for additional conductive treatment [6] as with a conventional  
83 scanning EM (SEM). In the medical field, using rRT-PCR and INSM as two  
84 sensitive rapid diagnostic tests will help maintain patient health. INSM also is a  
85 highly sensitive diagnostic tool for several pathogenic infections or other diagnoses.

86

## 87 **Methods**

### 88 **Ethical statement**

89 The study was approved by the Hamamatsu University School of Medicine ethical  
90 committee (No. 19-134), and all methods were performed following relevant  
91 guidelines and regulations.

### 92 **Immunochromatography kit**

93 The ImunoAce<sup>®</sup> Flu kit (NP antigen detection), a human influenza commercial  
94 diagnosis kit, was purchased from TAUNS Laboratories, Inc. (Shizuoka, Japan).

95 Au/Pt nanoparticles were utilized to visualize the positive lines. A total of 197  
96 clinical samples from patients suspected to be suffering from influenza were  
97 provided by a general hospital at the Hamamatsu University School of Medicine  
98 for examination using the Flu kit. After macroscopic diagnosis using the Flu kit, the  
99 samples were stored in a biosafety box at room temperature (20-25 °C / 68 - 77 °F).  
100 The IgM detection immunochromatography kit against SARS-CoV-2 was obtained  
101 from Kurabo Industries, Ltd. (Osaka, Japan).

#### 102 **One step rRT-PCR for influenza A**

103 rRT-PCR for influenza A was performed as described previously using Flu A  
104 universal primers [7]. A Ct within 38.0 was considered as positive according to the  
105 CDC protocol [8]. The primer/probe set targeted the human RNase P gene and  
106 served as an internal control for human nucleic acid as described previously [9].

#### 107 **SEM image acquisition**

108 The immunochromatography kit was covered with modified NanoSuit® solution  
109 based on previously published components [5] (Nisshin EM Co., Ltd., Tokyo,  
110 Japan), placed first onto the wide stage of the specimen holder, and then placed

111 in an Lv-SEM (TM4000Plus, Hitachi High-Technologies, Tokyo, Japan). Images  
112 were acquired using backscattered electron detectors with 10 or 15 kV at 30 Pa.

### 113 **Particle counting**

114 In fields containing fewer than 50 particles/field, the particles were counted  
115 manually. Otherwise, ImageJ/Fiji software was used for counting. ImageJ/Fiji uses  
116 comprehensive particle analysis algorithms that effectively count various particles.  
117 Images were then processed and counting was performed according to the  
118 protocol [10].

### 119 **Diagnosis and statistics**

120 The EM diagnosis and criteria for a positive test were defined as follows: particle  
121 numbers from 6 fields from the background area and test-line were statistically  
122 analyzed using the *t*-test. If there were more than 5 particles in one visual field and  
123 a significant difference ( $P < 0.01$ ) was indicated by the *t*-test, the result was  
124 considered as positive. Statistical analysis using the *t*-test was performed in Excel  
125 software. Statistical analysis of the assay sensitivity and specificity with a 95%  
126 confidence interval (95% CI) was performed using the MedCalc statistical website.  
127 The approximate line, correlation coefficient, and null hypothesis were calculated  
128 with Excel software.

129

## 130 **Results**

131 To investigate the sensitivity and specificity of immunochromatography using the  
132 NanoSuit<sup>®</sup> method, an influenza diagnostic kit (TAUNS Laboratories, Inc.) was  
133 prepared (**Fig. 1A**). Two specific antibodies were used: one (anti-mouse IgG or  
134 anti-influenza A NP) was immobilized on chromatographic paper, whereas the  
135 other was labeled with colloidal gold/platinum (100–200 nm in diameter) and  
136 infiltrated into the sample pad. The kit was completed by attaching the sample pad  
137 at the end of the membrane. When the clinical sample in lysis buffer (150  $\mu$ L) was  
138 placed on the sample pad, the virus antigen in the sample formed an  
139 immunocomplex with the colloidal gold/platinum- labeled antibody, which  
140 subsequently formed an immune complex with the antibody immobilized on the  
141 membrane, resulting in the generation of colored lines and indicating the presence  
142 of the antigen of interest in the sample (**Fig. 1B top, middle**). After the reaction,  
143 NanoSuit<sup>®</sup> solution (100  $\mu$ L) was added upstream of the test-line (**Fig. 1B middle**),  
144 forming a thin NanoSuit<sup>®</sup> liquid layer (pale blue) (**Fig. 1B bottom**). The kit was  
145 positioned on the sample stage in the sample chamber of the SEM as close and  
146 parallel as possible to the camera (**Fig. 1C**). The observation position of the test-  
147 line and background area were determined at fixed distances from the control-line



148 border. The number of Au/Pt particles at the test-line and background area were  
149 counted in 6 fields of view at  $\times 1200$  (**Fig. 1D**). Without NanoSuit<sup>®</sup> treatment,  
150 swelling of the cellulose and residual liquid present due to electron beam energy  
151 were observed (**Fig. 2A**). In contrast, following NanoSuit<sup>®</sup> treatment, the cellulose  
152 membrane showed little or no swelling (**Fig. 2B**).

153 The SEM images of the test lines and background were compared. **Figure 3A,**  
154 **D** show the “macroscopic diagnosis-positive” test-line. **Figure 3B, E** are images of  
155 the “macroscopic diagnosis-negative” and “EM diagnosis-positive” test-line.  
156 **Figure 3C, F** are the images of the background. Au/Pt particles (arrows) of the  
157 test-line were clearly visualized (**Fig. 3A, B, D, E**) compared to background areas  
158 of the cellulose membrane (**Fig. 3C, F**). Au/Pt particle counting was performed by  
159 using ImageJ/Fiji software for macroscopic diagnosis-positive samples. Manual  
160 counting was performed for the images of “background” and “macroscopic  
161 diagnosis negative and SEM diagnosis-positive” samples as well as “EM-negative”  
162 samples. Another immunochromatography diagnosis kit for detecting IgM  
163 antibodies against SARS-CoV-2 from Kurabo Industries, Ltd. was tested using the  
164 NanoSuit<sup>®</sup> method (**S1A Fig**). The cellulose membrane image without the  
165 immunocomplex was clearly visualized after NanoSuit<sup>®</sup> treatment (**S1B Fig**).

166 Approximately 25-nm countable gold nanoparticles (GNPs) of the control-line were  
167 detected (**S1C Fig**).

168 Diagnoses based on macroscopic, EM, and rRT-PCR results were compared  
169 using the 197 influenza-suspected clinical samples. rRT-PCR for influenza A was  
170 performed with the same clinical pharyngeal swab samples as used in  
171 immunochromatography. To examine the relationship between the influenza copy  
172 number and rRT-PCR threshold, serial dilutions were prepared (**S2A Fig**). A  
173 calibration curve (**S2B Fig**) was drawn to determine the relationship between the  
174 copy number and cycle threshold (Ct) (**S2C Fig**). In our assay system,  $Ct \leq 38.0$   
175 was calculated to be  $\geq 151.4$  copies/reaction.

176 The quantitative relationship between particle counts/fields (log<sub>10</sub>) and Ct are  
177 shown as a scatter diagram. The correlation coefficient of Ct and particle  
178 counts/field was -0.803, which was significant ( $p = 3.79E-08$ ) and the null  
179 hypothesis was rejected (**Fig. 4**) (**Supplemental data**).

180 The EM diagnosis for influenza A showed 94% clinical sensitivity (29/31) (95%  
181 confidence interval [95%CI]: 78.58–99.21%) and 100% clinical specificity (95%CI:  
182 97.80–100%) (**Table 1**) (**Supplemental data**), as well as a strong correlation  
183 (kappa; 0.99) compared with the results obtained by rRT-PCR ( $14.0 \leq Ct \leq 38.0$ )  
184 (**Table 2**) (**Supplemental data**). In contrast, standard macroscopic diagnosis

185 showed 77% clinical sensitivity (24/31) (95%CI: 58.90–90.41%) and 100% clinical  
186 specificity (95%CI: 97.80–100%) (**Table 1**) (**Supplemental data**), along with a  
187 strong correlation (kappa; 0.96) compared with the results obtained by rRT-PCR  
188 ( $14.0 \leq Ct \leq 38.0$ ) (**Table 2**)(**Supplemental data**).

189

## 190 **Discussion**

191 Rapid diagnostic tests show variable assay performance with sensitivities of 10–  
192 70% and up to 90% specificity compared to standard rRT-PCR-based assays [11].  
193 Their sensitivity has been improved by employing europium nanoparticles, which  
194 show 82.59% sensitivity and 100% specificity for clinically evaluated influenza A  
195 (H1N1) [12]. The use of silver amplification immunochromatography in influenza  
196 virus detection kits showed 91.2% sensitivity and 95.8% specificity [13]. Moreover,  
197 the rapid fluorescent immunochromatographic test employing CdSe/CdS/ZnS  
198 quantum dots showed 93.75% clinical sensitivity and 100% clinical specificity [14].  
199 However, the potential toxic effects of cadmium-based quantum dots are  
200 controversial [15]. INSM is safe and showed the highest sensitivities (94% clinical  
201 sensitivity, 100% clinical specificity) in this study. Generally, overall sensitivity  
202 depends on the distribution of each sample's pathogen-copy number in the  
203 investigated group. Our study revealed that EM diagnosis was significantly more

204 sensitive (71.2%) than macroscopic diagnosis (14.3%) in the lower copy number  
205 group ( $30.0 \leq Ct \leq 38$ ). The detection ability of our method is comparable to that of  
206 rRT-PCR (**Fig. 4**). Theoretically and practically, our method shows the highest  
207 detection performance as an immunochromatographic diagnostic method. More  
208 sensitive immunochromatographic products may be developed in future through  
209 further improvements such as by optimizing the antigen concentration.

210 PCR has recently been used as a main diagnostic tool for SARS-CoV-2. The  
211 introduction of immunochromatography analysis using the SARS-CoV-2 antigen  
212 has greatly changed testing practices. All immunochromatographic-negative  
213 SARS-CoV-2-suspected samples are recommended for analysis by PCR. Highly  
214 sensitive immunochromatographic tests for infectious diseases can greatly reduce  
215 the number of PCR samples to be analyzed. Furthermore, Cohen and Kessel  
216 reported high false-positive rates of RT-PCR testing for SARS-CoV-2 using clinical  
217 samples. Overall, 336 of 10,538 negative samples (3.2%) were reported as  
218 positive. In contrast, <0.6–7.0% false-positive rates in external quality  
219 assessments of RNA virus assays were reported for influenza A. The amplification  
220 of nucleic acids makes PCR-based assays highly sensitive but highly vulnerable  
221 to minute levels of sample contamination which can produce false-positive results  
222 indistinguishable from true-positive results [16]. The same pitfall may be found in  
223 Loop-Mediated Isothermal Amplification (LAMP) method. We propose that

224 macroscopic immunochromatographic-negative and PCR- or LAMP-positive  
225 cases should be compared with highly sensitive immunochromatographic data  
226 such as that obtained by INSM as well as clinical data to reduce false-positive  
227 cases.

228 Although ImageJ/Fiji is useful software, it should be further developed to increase  
229 its reliability. The development of an automated GNP counting system to replace  
230 manual counting using deep learning is being evaluated by our team. Furthermore,  
231 clinical application of using an automated inexpensive SEM for  
232 immunochromatography in combination with INSM for SEM shows potential.  
233 Among the commonly used micro/nano-particles in immunochromatography,  
234 colloidal GNP is the most widely used [3]. GNP is safe and can be easily  
235 conjugated with biomolecules that retain their biochemical activity upon binding.  
236 Therefore, developing new GNP-based LFBs may be easier and faster than  
237 developing micro/nano-materials and can be adapted quickly for new emerging  
238 infections such as SARS-CoV-2 [17]. Investigation of INSM using smaller GNPs is  
239 currently underway. INSM is applicable to all LFBs, particularly in emergency tests  
240 to evaluate troponin, brain natriuretic peptide, and procalcitonin as measured by  
241 immunochromatography.

242 Diagnosis using the INSM shows high sensitivity, as it allows for direct particle  
243 observation. Our results indicate that INSM can be used for automated quantitative  
244 measurement in any immunochromatographic tests including recently developed  
245 SARS-CoV-2 antigen or IgM/IgG antibodies tests against SARS-CoV-2. This  
246 method can be used to promptly diagnose new emerging infections including those  
247 in livestock and promote innovations in assays using LFBs.

248

## 249 **Acknowledgments**

250 The authors thank Noriko Aoki (TAUNS Laboratories, Inc.) for providing rRT-PCR  
251 data on influenza A and Takafumi Miwa and Takumi Tandou (Hitachi, Ltd.  
252 Research & Development Group Nano-process Research Department) for  
253 advising on SEM. We also thank the clinical laboratory center of Hamamatsu  
254 University School of Medicine, University Hospital for providing influenza  
255 immunochromatography test strips after routine examinations. This work was  
256 supported by JST START (grant number 714 [to H.K.]), JSPS KAKENHI (grant  
257 numbers JP17K08784 [to H.K.] and JP18H01869 [to T.H.]), and AMED (grant  
258 number A508 [to H.K.]).

259

## 260 **Competing interests**

261 The authors declare no competing interests.

## 262 **References**

- 263 [1] Swerdlow DL, Finelli L. Preparation for possible sustained transmission of 2019  
264 novel coronavirus: lessons from previous epidemics. *JAMA*. 2020;323: 1129-1130.
- 265 [2] Ravina R, Dalal A, Mohan H, Prasad M, Pundir CS. Detection methods for  
266 influenza A H1N1 virus with special reference to biosensors: a review. *Biosci Rep*.  
267 2020;40.
- 268 [3] Huang Y, Xu T, Wang W, Wen Y, Li K, Qian L, et al. Lateral flow biosensors based  
269 on the use of micro- and nanomaterials: a review on recent developments.  
270 *Mikrochim Acta*. 2019;187: 70.
- 271 [4] Urusov AE, Zherdev AV, Dzantiev BB. Towards lateral flow quantitative assays:  
272 detection approaches. *Biosensors (Basel)*. 2019;9.
- 273 [5] Takaku Y, Suzuki H, Ohta I, Ishii D, Muranaka Y, Shimomura M, et al. A thin  
274 polymer membrane, nano-suit, enhancing survival across the continuum between  
275 air and high vacuum. *Proc Natl Acad Sci USA*. 2013;110: 7631-7635.
- 276 [6] Kawasaki H, Itoh T, Takaku Y, Suzuki H, Kosugi I, Meguro S, et al. The NanoSuit  
277 method: a novel histological approach for examining paraffin sections in a  
278 nondestructive manner by correlative light and electron microscopy. *Lab Invest*  
279 2020;100: 161-173.
- 280 [7] de-Paris F, Beck C, Machado ABMP, Paiva RM, da Silva Menezes D, de Souza  
281 Nunes L, et al. Optimization of one-step duplex real-time RT-PCR for detection of



- 282 influenza and respiratory syncytial virus in nasopharyngeal aspirates. J Virol  
283 Methods. 2012;186: 189-192.
- 284 [8] CDC. Division CDC Human Influenza Virus Real-Time RT-PCR Diagnostic Panel  
285 (CDC Flu rRT-PCR Dx Panel). 2014. Available from:  
286 [https://journals.plos.org/plosone/article/file?type=supplementary&id=info:doi/10.1](https://journals.plos.org/plosone/article/file?type=supplementary&id=info:doi/10.1371/journal.pone.0201248.s007)  
287 [371/journal.pone.0201248.s007](https://journals.plos.org/plosone/article/file?type=supplementary&id=info:doi/10.1371/journal.pone.0201248.s007).
- 288 [9] WHO Collaborating Centre for Influenza, GA. CDC protocol of realtime RTPCR for  
289 influenza A (H1N1) 2009. Available from:  
290 <https://www.who.int/csr/resources/publications/swineflu/realtimeptcr/en/>.
- 291 [10] O'Brien J, Hayder H, Peng C. Automated quantification and analysis of cell  
292 counting procedures using ImageJ plugins. J Vis Exp. 2016;17: 54719.
- 293 [11] Vemula SV, Zhao J, Liu J, Wang X, Biswas S, Hewlett I. Current approaches for  
294 diagnosis of influenza virus infections in humans. Viruses. 2016;8: 96.
- 295 [12] Yu ST, Bui CT, Kim DTH, Ngyuen AVT, Trinh TTT, Yeo SJ. Clinical evaluation of  
296 rapid fluorescent diagnostic immunochromatographic test for influenza A virus  
297 (H1N1). Sci Rep. 2018;8: 13468.
- 298 [13] Mitamura K, Zhimizu H, Yamazaki M, Ichikawa M, Nagai K, Katada J, et al. Clinical  
299 evaluation of highly sensitive silver amplification immunochromatography systems  
300 for rapid diagnosis of influenza. J Virol Methods. 2013;194: 123-128.

- 301 [14] Nguyen AVT, Dao TD, Trinh TTT, Choi DY, Yu ST, Park H, et al. Sensitive  
302 detection of influenza a virus based on a CdSe/CdS/ZnS quantum dot-linked rapid  
303 fluorescent immunochromatographic test. *Biosens Bioelectron.* 2020;155: 112090.
- 304 [15] Oh E, Liu R, Nel A, Gemill KB, Bilal M, Cohen Y, et al. Meta-analysis of cellular  
305 toxicity for cadmium-containing quantum dots. *Nat Nanotechnol.* 2016;11: 479-486.
- 306 [16] Cohen AN, Kessel B. False positives in reverse transcription PCR testing for  
307 SARS-CoV-2. *medRxiv.* 2020.
- 308 [17] Sheridan C. Fast, portable tests come online to curb coronavirus pandemic. *Nat*  
309 *Biotechnol.* 2020;38: 515-518.

310 **Figures**

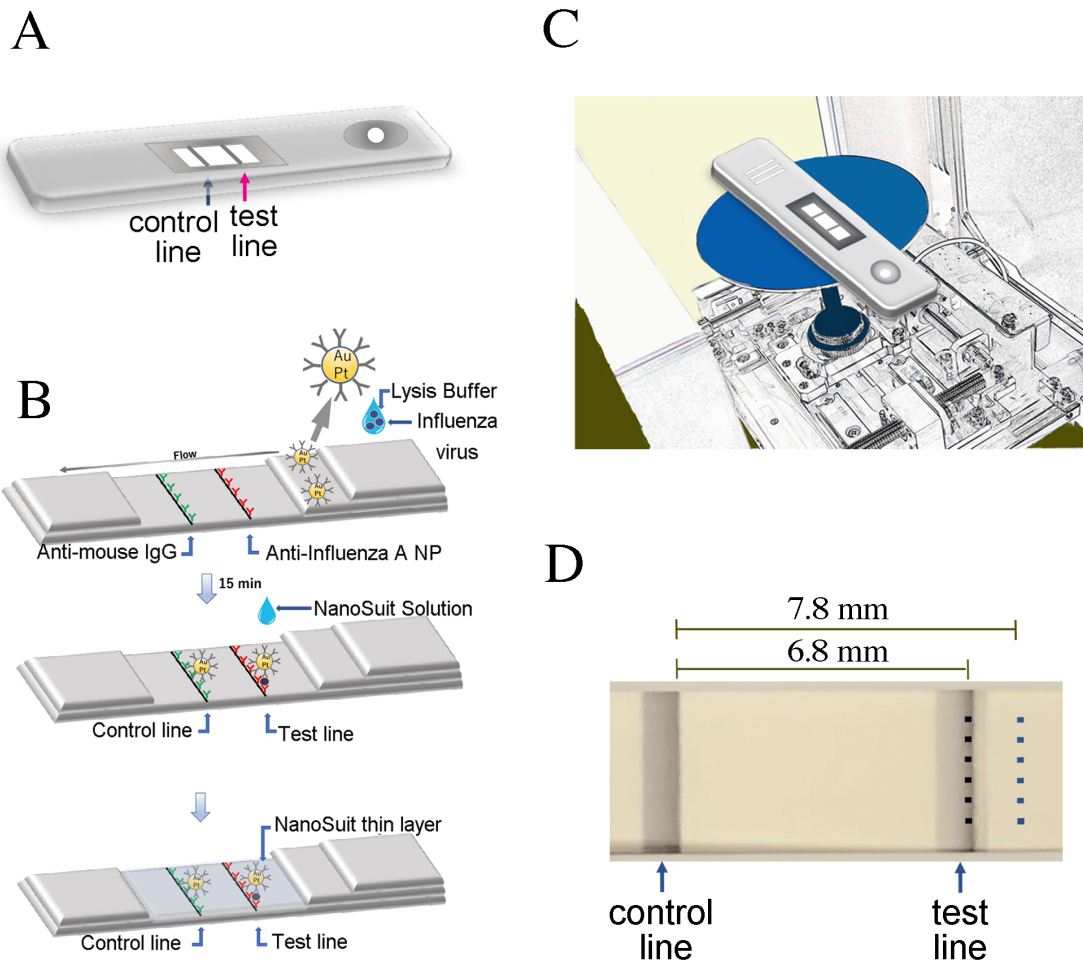

311

312 **Figure 1.** Sensitivity and specificity of immunochromatography using the  
313 NanoSuit<sup>®</sup> method. (A) Kit representation showing test and control lines. (B)  
314 Schematic diagram of the gold/platinum (Au/Pt)-Ab conjugate-linked rapid  
315 immunochromatographic kit. The immune-complex reacted with the anti-influenza  
316 A nucleoprotein (NP) at the test line and anti-mouse IgG at the control-line (top,  
317 middle). A NanoSuit<sup>®</sup> thin layer was formed after NanoSuit<sup>®</sup> treatment (bottom).

318 (C) Kit placement in the SEM chamber. (D) Determination of the observation  
319 positions. Six fields were randomly selected in the test line and background areas.

320

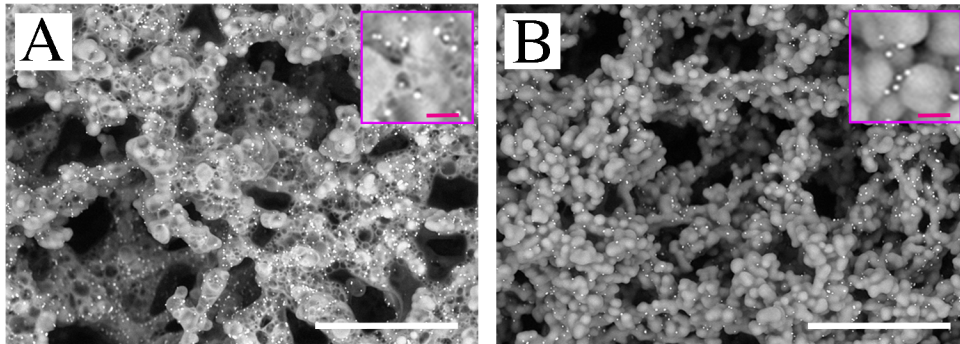

321

322 **Figure 2.** (A, B) Images of cellulose and Au/Pt-labeled immunocomplex with  
323 immobilized antibody without (A) and with NanoSuit treatment (B). Scale bars in  
324 (A) and (B) = 15  $\mu\text{m}$ . Inset is magnified image. Scale bars 600 nm.

325

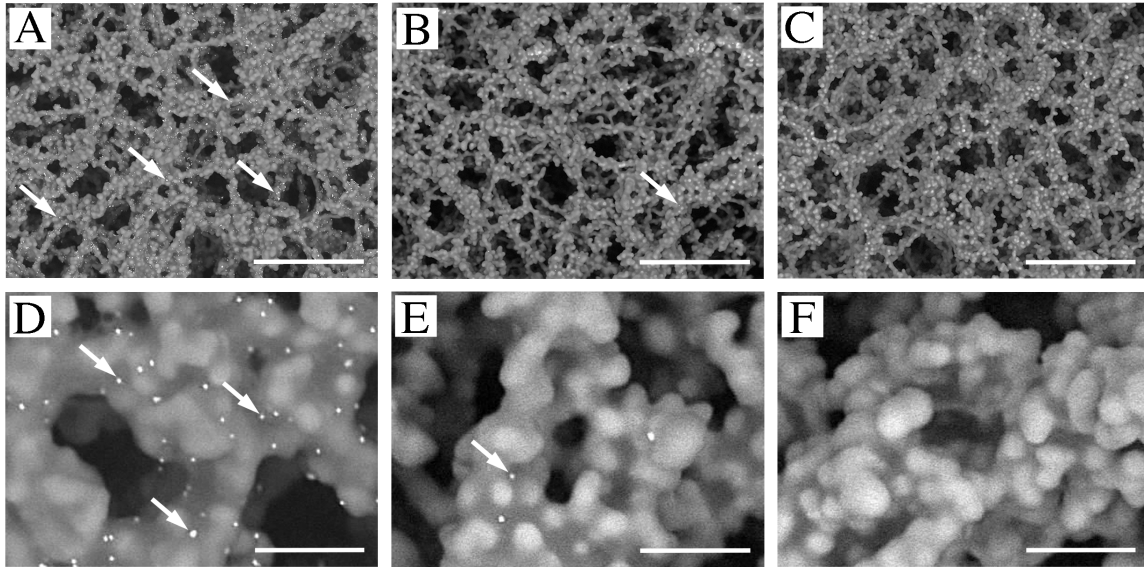

326

327 **Figure 3.** Comparison of SEM images of test lines and of background. **(A, D)**  
328 images of “macroscopic diagnosis-positive” test-line. **(B, E)** Images of  
329 “macroscopic diagnosis-negative” and “EM diagnosis-positive” test-line. **(C, F)**  
330 Images of “background”. White arrows indicate representative Au/Pt particles.  
331 Scale bars in **(A, B, C)** = 30  $\mu\text{m}$  and **(D, E, F)** = 3  $\mu\text{m}$ .

332

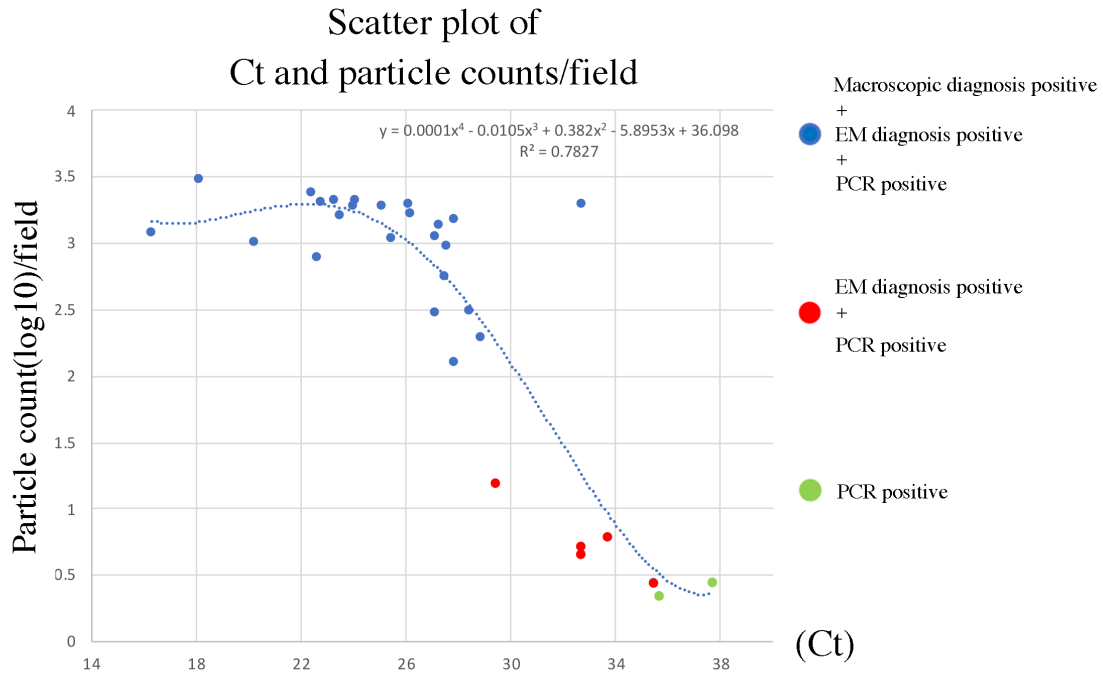

333

334 **Figure 4.** Scatter plot of Ct and particle counts/field. Blue dot represents triple-  
 335 positive (“macroscopic diagnosis-positive” and “EM diagnosis-positive” and “PCR  
 336 diagnosis-positive”). Red dot represents double-positive (“EM diagnosis-positive”  
 337 and “PCR diagnosis-positive”). Green dot represents single-positive (“PCR  
 338 diagnosis-positive”). Blue dot line is approximate curve. Vertical axis: particle  
 339 counts (log10)/field. Horizontal axis: Ct of influenza A.

340

| Influenza A<br>rRT-PCR | Ct           | Macroscopic diagnosis |                | Electron microscopic diagnosis |                |
|------------------------|--------------|-----------------------|----------------|--------------------------------|----------------|
|                        |              | Sensitivity           | Specificity    | Sensitivity                    | Specificity    |
| Positive<br>(n=31)     | 14.0≤Ct<22.0 | 100% (3/3)            |                | 100% (3/3)                     |                |
|                        | 22.0≤Ct<30.0 | 95.2% (20/21)         |                | 100% (21/21)                   |                |
|                        | 30.0≤Ct≤38.0 | 14.3% (1/7)           |                | 71.4% (5/7)                    |                |
|                        | 14.0≤Ct≤38.0 | 77.4% (24/31)         |                | 93.5% (29/31)                  |                |
| Negative<br>(n=166)    | Ct>38.0      |                       | 100% (166/166) |                                | 100% (166/166) |

341

342 **Table 1.** Clinical diagnostic performance of EM assay. Thirty-one influenza A-rRT-

343 PCR-positive samples were used to determine the sensitivity of the assays, and

344 166 influenza rRT-PCR-negative samples were used to determine the specificity

345 of the assays.

346

|                        |          | Macroscopic diagnosis |          |              | Electron microscopic diagnosis |          |              |
|------------------------|----------|-----------------------|----------|--------------|--------------------------------|----------|--------------|
|                        |          | positive              | negative | Row Marginal | positive                       | negative | Row Marginal |
| Influenza A<br>rRT-PCR | Positive | 24                    | 7        | 31           | 29                             | 2        | 31           |
|                        | Negative | 0                     | 166      | 166          | 0                              | 166      | 166          |
| Column Marginal        |          | 24                    | 172      | 197          | 29                             | 168      | 197          |
| % Agreement(kappa)     |          | 0.96: 24+166/197      |          |              | 0.99: 29+166/197               |          |              |

347

348 **Table 2.** Comparison of EM diagnosis with rRT-PCR and macroscopic diagnosis  
 349 by immunochromatography.

350

351 **Supplemental Figure 1.**

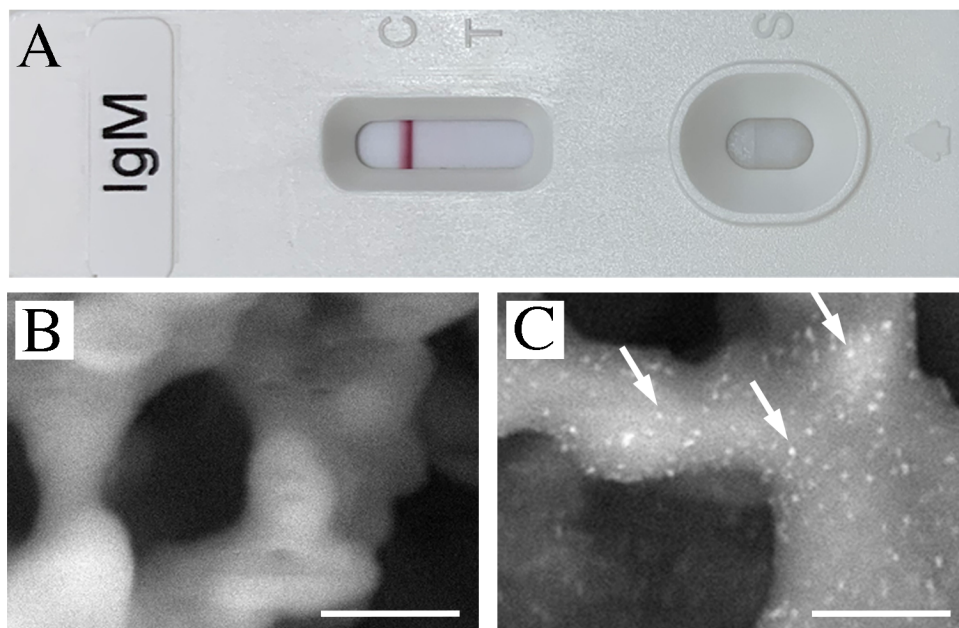

352

353 **(A)** Immunochromatography diagnosis kit for IgM antibody against SARS-CoV-2.

354 **(B)** Background image. **(C)** Multiple gold nanoparticles (GNPs) (approximately 25-



355 nm diameter) of the control-line on cellulose. White arrows indicate representative  
356 GNPs. Scale bars in **(B)** and **(C)** = 600 nm.

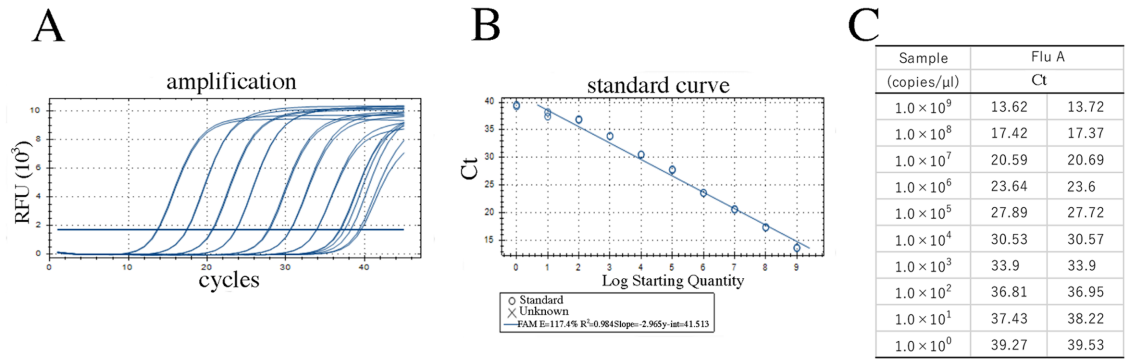

357

358 **Supplemental Figure 2.** Comparison of macroscopic, electron microscopic (EM)

359 and rRT-PCR influenza A diagnoses. **(A)** rRT-PCR amplification curve for

360 influenza A. (B) Standard curve for rRT-PCR of influenza A. (C) Relationship  
 361 between cycle threshold (Ct) and sample copy numbers/reaction.

362

363 **Supplemental data**

| Case   | Macroscopic Diagnosis | Electron Microscopic Diagnosis | BG: 1 particles/field | BG: 2 particles/field | BG: 3 particles/field | BG: 4 particles/field | BG: 5 particles/field | BG: 6 particles/field | Average BG  | TL1 particles/field | TL2 particles/field | TL3 particles/field | TL4 particles/field | TL5 particles/field | TL6 particles/field | Average TL  | t-test      | Diagnosis | rRT-PCR | CT1   | CT2   | Average CT | Diagnosis |
|--------|-----------------------|--------------------------------|-----------------------|-----------------------|-----------------------|-----------------------|-----------------------|-----------------------|-------------|---------------------|---------------------|---------------------|---------------------|---------------------|---------------------|-------------|-------------|-----------|---------|-------|-------|------------|-----------|
| No. 1  | positive              |                                | 2                     | 2                     | 3                     | 0                     | 1                     | 3                     | 1.83333333  | 1057                | 886                 | 1472                | 1005                | 1026                | 1241                | 1114.5      | 2.34304E-05 | positive  |         | 27.13 | 27.19 | 27.16      | positive  |
| No. 2  | positive              |                                | 9                     | 12                    | 6                     | 7                     | 12                    | 16                    | 10.33333333 | 1459                | 2104                | 1482                | 759                 | 2424                | 1292                | 1586.666667 | 0.00063971  | positive  |         | 23.46 | 23.65 | 23.51      | positive  |
| No. 3  | positive              |                                | 26                    | 17                    | 17                    | 12                    | 11                    | 27                    | 18.33333333 | 345                 | 362                 | 291                 | 332                 | 259                 | 365                 | 325.3333333 | 3.06815E-06 | positive  |         | 28.49 | 28.46 | 28.48      | positive  |
| No. 4  | positive              |                                | 48                    | 42                    | 24                    | 39                    | 19                    | 20                    | 32          | 1839                | 1401                | 1610                | 1897                | 2140                | 1293                | 1696.666667 | 2.67998E-05 | positive  |         | 26.21 | 26.21 | 26.21      | positive  |
| No. 5  | positive              |                                | 3                     | 2                     | 0                     | 3                     | 3                     | 4                     | 2.5         | 332                 | 320                 | 301                 | 291                 | 203                 | 339                 | 297.6666667 | 1.39772E-05 | positive  |         | 27.16 | 27.18 | 27.17      | positive  |
| No. 6  | positive              |                                | 11                    | 7                     | 34                    | 17                    | 27                    | 16                    | 18.66666667 | 2153                | 3166                | 1169                | 2059                | 1880                | 1307                | 1955.666667 | 0.000616081 | positive  |         | 26.12 | 26.2  | 26.16      | positive  |
| No. 7  | positive              |                                | 15                    | 17                    | 2                     | 15                    | 8                     | 14                    | 11.83333333 | 987                 | 1334                | 887                 | 1458                | 1294                | 1298                | 1209.666667 | 2.04264E-05 | positive  |         | 16.3  | 16.37 | 16.33      | positive  |
| No. 8  | positive              |                                | 14                    | 8                     | 5                     | 5                     | 17                    | 18                    | 11.16666667 | 1162                | 1570                | 2462                | 2013                | 2375                | 2404                | 1997.666667 | 0.000128189 | positive  |         | 22.78 | 22.85 | 22.82      | positive  |
| No. 9  | positive              |                                | 13                    | 31                    | 16                    | 20                    | 8                     | 23                    | 18.5        | 913                 | 559                 | 811                 | 688                 | 669                 | 1083                | 787.1666667 | 9.16168E-05 | positive  |         | 22.58 | 22.68 | 22.63      | positive  |
| No. 10 | positive              |                                | 21                    | 28                    | 16                    | 16                    | 18                    | 8                     | 17.83333333 | 972                 | 1037                | 556                 | 1160                | 566                 | 1468                | 959.8333333 | 0.000644387 | positive  |         | 27.64 | 27.59 | 27.62      | positive  |
| No. 11 | positive              |                                | 5                     | 5                     | 5                     | 7                     | 4                     | 3                     | 4.83333333  | 1077                | 1741                | 2682                | 1548                | 1726                | 2736                | 1918.333333 | 0.000425094 | positive  |         | 32.7  | 32.83 | 32.57      | positive  |
| No. 12 | positive              |                                | 0                     | 1                     | 0                     | 2                     | 2                     | 6                     | 1.83333333  | 1682                | 1984                | 2295                | 1973                | 2081                | 1417                | 1905.333333 | 1.21327E-05 | positive  |         | 25.1  | 25.1  | 25.1       | positive  |
| No. 13 | positive              |                                | 22                    | 35                    | 15                    | 8                     | 19                    | 12                    | 20.16666667 | 2981                | 2579                | 3371                | 3044                | 2322                | 3096                | 3049.5      | 6.83137E-07 | positive  |         | 18.21 | 18.15 | 18.18      | positive  |
| No. 14 | positive              |                                | 34                    | 36                    | 12                    | 8                     | 12                    | 13                    | 19.16666667 | 2861                | 2748                | 2548                | 2774                | 1634                | 1770                | 2389.166667 | 5.91063E-05 | positive  |         | 22.33 | 22.49 | 22.41      | positive  |
| No. 15 | positive              |                                | 55                    | 22                    | 25                    | 46                    | 60                    | 34                    | 40.33333333 | 1152                | 606                 | 490                 | 503                 | 442                 | 399                 | 598.6666667 | 0.002101821 | positive  |         | 27.54 | 27.48 | 27.51      | positive  |
| No. 16 | positive              |                                | 42                    | 12                    | 30                    | 27                    | 42                    | 34                    | 31.16666667 | 1927                | 988                 | 1100                | 1162                | 1339                | 2577                | 1515.5      | 0.000959966 | positive  |         | 27.85 | 27.88 | 27.87      | positive  |
| No. 17 | positive              |                                | 1                     | 0                     | 3                     | 1                     | 1                     | 2                     | 1.33333333  | 196                 | 243                 | 171                 | 142                 | 151                 | 244                 | 191.1666667 | 7.12664E-05 | positive  |         | 28.99 | 28.85 | 28.92      | positive  |
| No. 18 | positive              |                                | 14                    | 7                     | 4                     | 1                     | 4                     | 4                     | 5.66666667  | 2207                | 1759                | 2749                | 2089                | 1769                | 2087                | 2108.166667 | 1.58095E-05 | positive  |         | 23.33 | 23.55 | 23.29      | positive  |
| No. 19 | positive              |                                | 0                     | 0                     | 2                     | 2                     | 1                     | 3                     | 1.33333333  | 874                 | 649                 | 993                 | 1153                | 1280                | 1055                | 1000.5      | 5.17775E-05 | positive  |         | 20.23 | 20.29 | 20.26      | positive  |
| No. 20 | positive              |                                | 9                     | 1                     | 1                     | 5                     | 11                    | 6                     | 5.5         | 1776                | 2260                | 1765                | 1609                | 1866                | 2106                | 1896.333333 | 3.70512E-06 | positive  |         | 24.1  | 24.04 | 24.07      | positive  |
| No. 21 | positive              |                                | 36                    | 40                    | 37                    | 11                    | 7                     | 4                     | 22.5        | 2280                | 2380                | 2036                | 2093                | 2056                | 1840                | 2114.166667 | 4.91638E-07 | positive  |         | 24.05 | 24.13 | 24.09      | positive  |
| No. 22 | positive              |                                | 2                     | 1                     | 0                     | 1                     | 0                     | 2                     | 1           | 1163                | 881                 | 1034                | 1005                | 1327                | 1027                | 1072.833333 | 6.28819E-06 | positive  |         | 25.52 | 25.51 | 25.52      | positive  |
| No. 23 | positive              |                                | 1                     | 0                     | 0                     | 0                     | 0                     | 0                     | 0.16666667  | 160                 | 187                 | 103                 | 107                 | 92                  | 109                 | 126.3333333 | 0.000222593 | positive  |         | 27.85 | 27.91 | 27.88      | positive  |
| No. 24 | positive              |                                | 0                     | 0                     | 0                     | 0                     | 0                     | 1                     | 1.16666667  | 1156                | 1487                | 1377                | 1403                | 1448                | 1308                | 1363.166667 | 5.30624E-07 | positive  |         | 27.24 | 24.33 | 27.29      | positive  |
| No. 25 | negative              |                                | 2                     | 1                     | 1                     | 1                     | 1                     | 3                     | 1.5         | 6                   | 1                   | 7                   | 8                   | 8                   | 9                   | 6.5         | 0.03016442  | positive  |         | 32.76 | 32.66 | 32.71      | positive  |
| No. 26 | negative              |                                | 2                     | 1                     | 0                     | 3                     | 2                     | 1                     | 1.5         | 19                  | 16                  | 25                  | 20                  | 12                  | 9                   | 16.66666667 | 0.000789827 | positive  |         | 29.55 | 29.5  | 29.53      | positive  |
| No. 27 | negative              |                                | 2                     | 0                     | 0                     | 4                     | 0                     | 1                     | 1.16666667  | 8                   | 5                   | 4                   | 5                   | 5                   | 7                   | 5.666666667 | 0.001001174 | positive  |         | 32.73 | 32.76 | 32.75      | positive  |
| No. 28 | negative              |                                | 0                     | 2                     | 2                     | 0                     | 1                     | 1                     | 1           | 6                   | 5                   | 7                   | 7                   | 11                  | 6                   | 7           | 0.00112374  | positive  |         | 33.92 | 33.56 | 33.94      | positive  |
| No. 29 | negative              |                                | 2                     | 4                     | 3                     | 2                     | 1                     | 3                     | 2.5         | 8                   | 5                   | 3                   | 4                   | 6                   | 5                   | 5.166666667 | 0.000796997 | positive  |         | 35.55 | 35.11 | 35.65      | positive  |
| No. 30 | negative              |                                | 15                    | 10                    | 5                     | 8                     | 4                     | 10                    | 8.66666667  | 12                  | 15                  | 11                  | 8                   | 11                  | 8                   | 10.83333333 | 0.138699902 | negative  |         | 35.72 | 35.77 | 35.75      | positive  |
| No. 31 | negative              |                                | 2                     | 0                     | 5                     | 0                     | 2                     | 1.5                   | 1.5         | 1                   | 5                   | 2                   | 6                   | 4                   | 7                   | 4.166666667 | 0.069899516 | negative  |         | 37.83 | 37.63 | 37.73      | positive  |

364

365 Comparison of among macroscopic diagnosis, EM diagnosis and rRT-PCR  
 366 diagnosis. BG: Background, TL: Test Line

**A**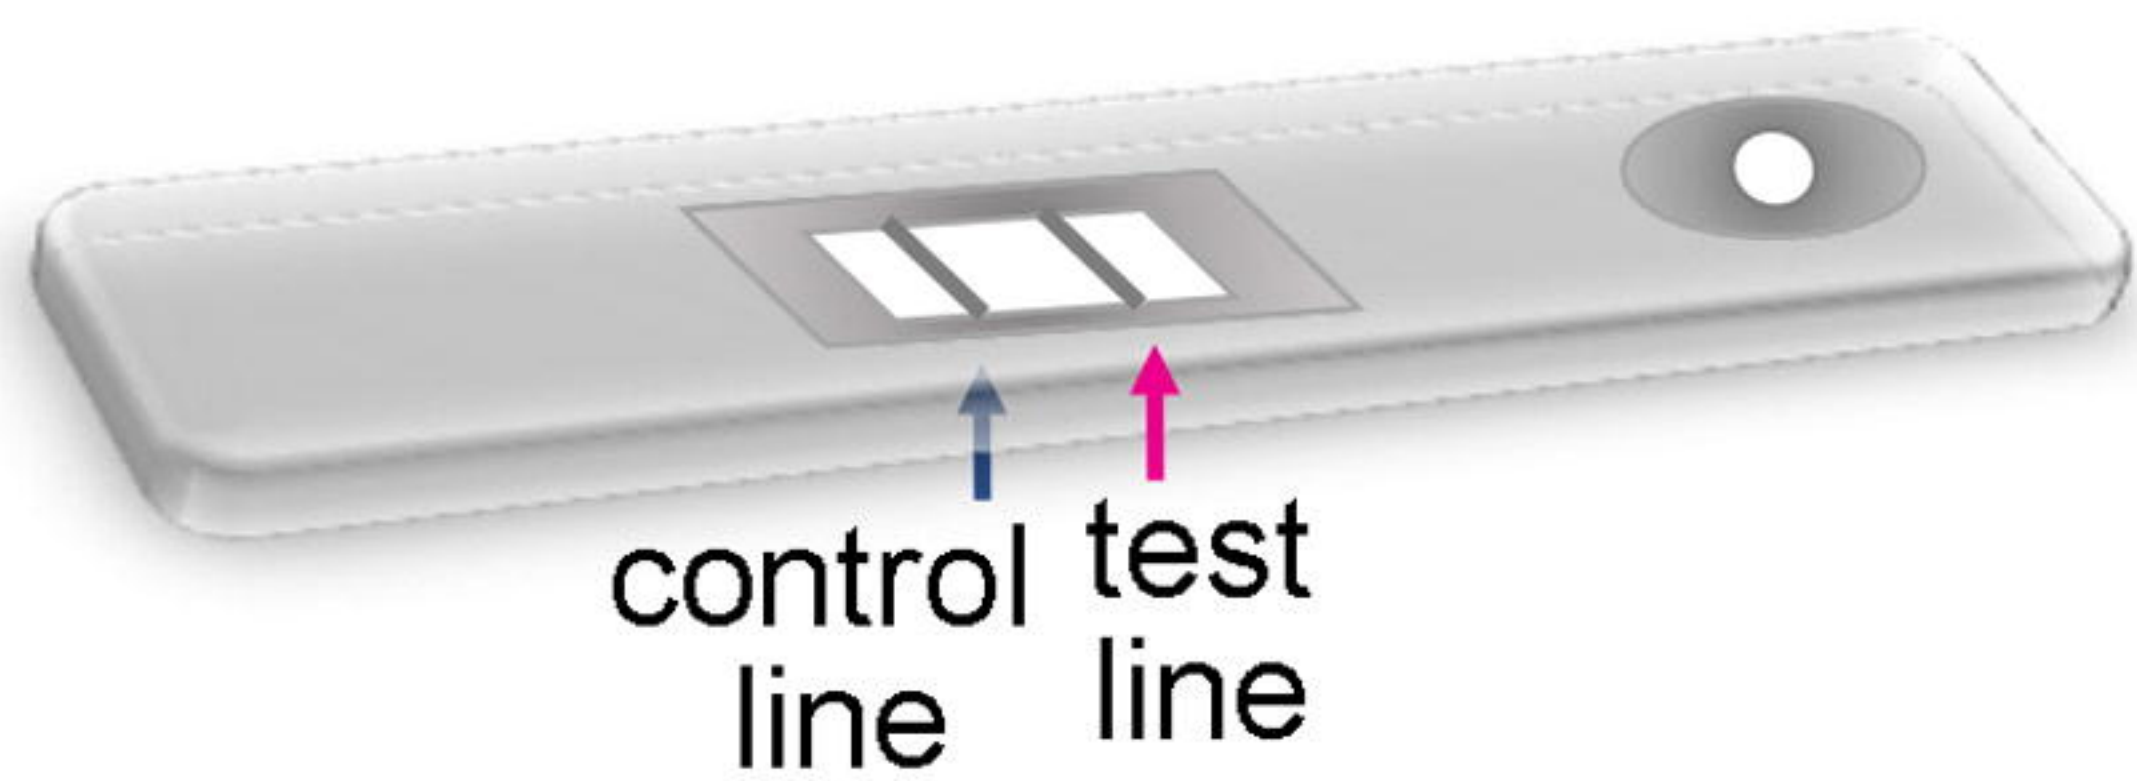**B**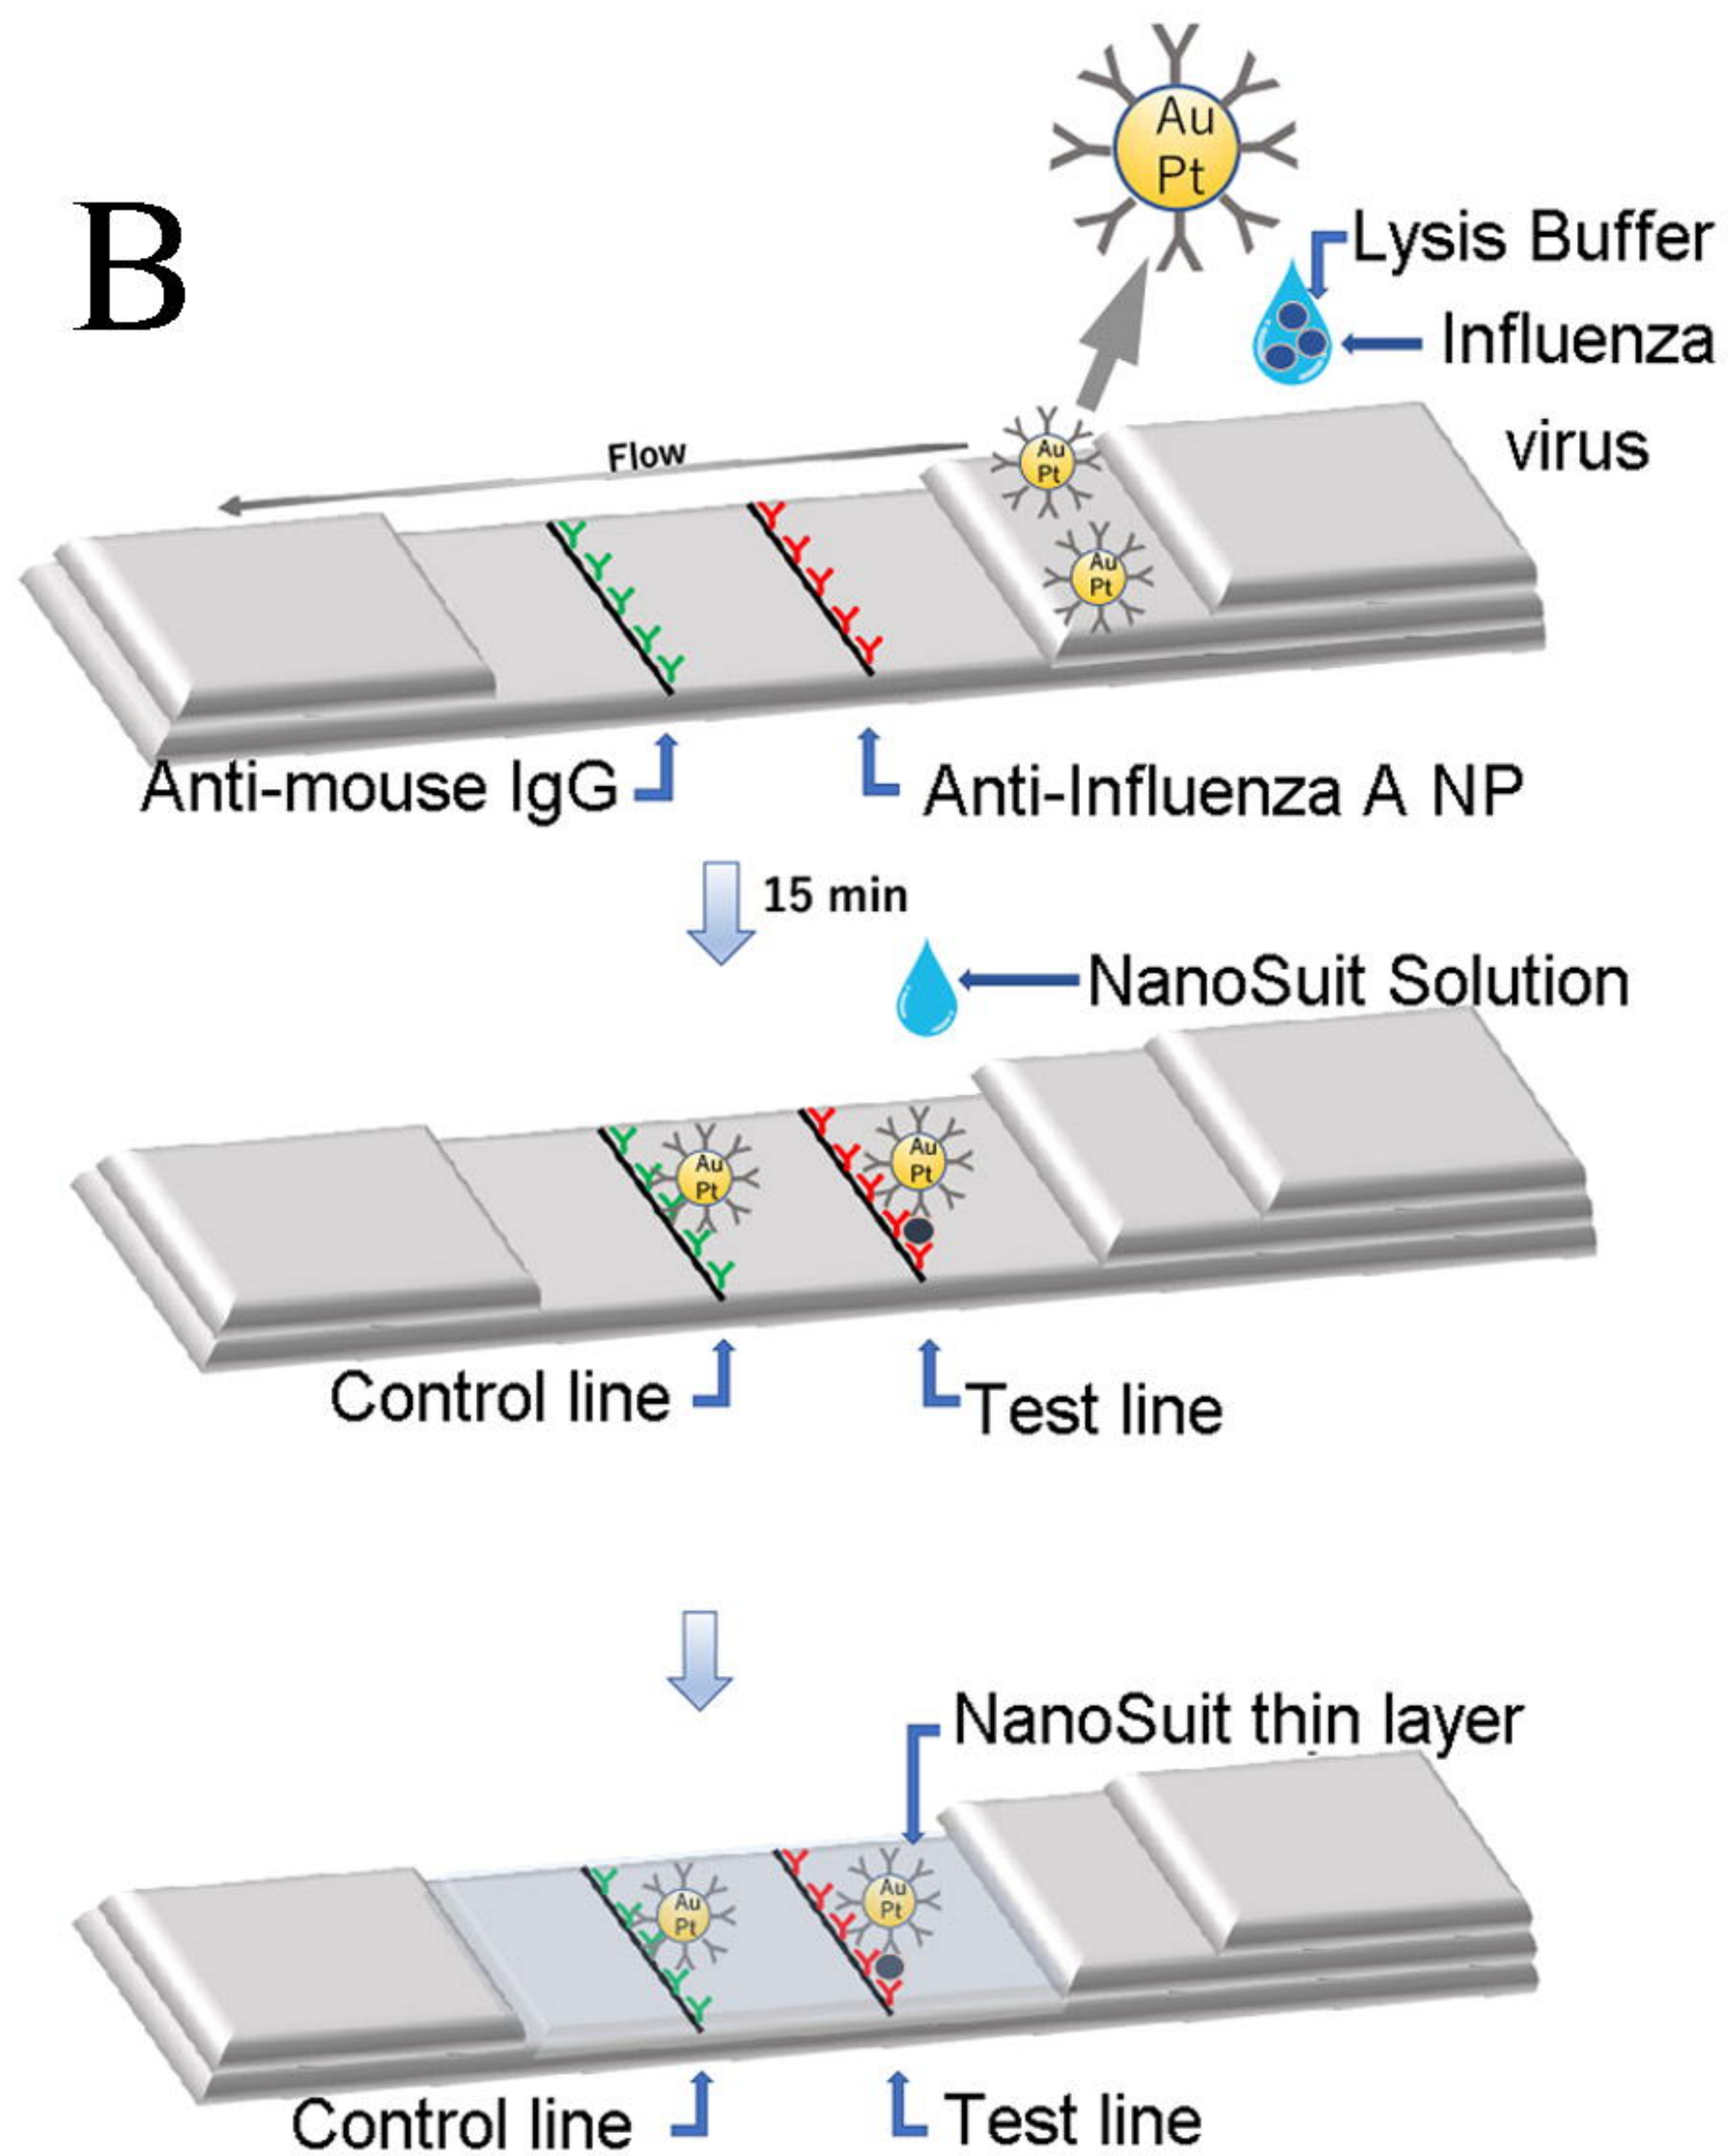**C**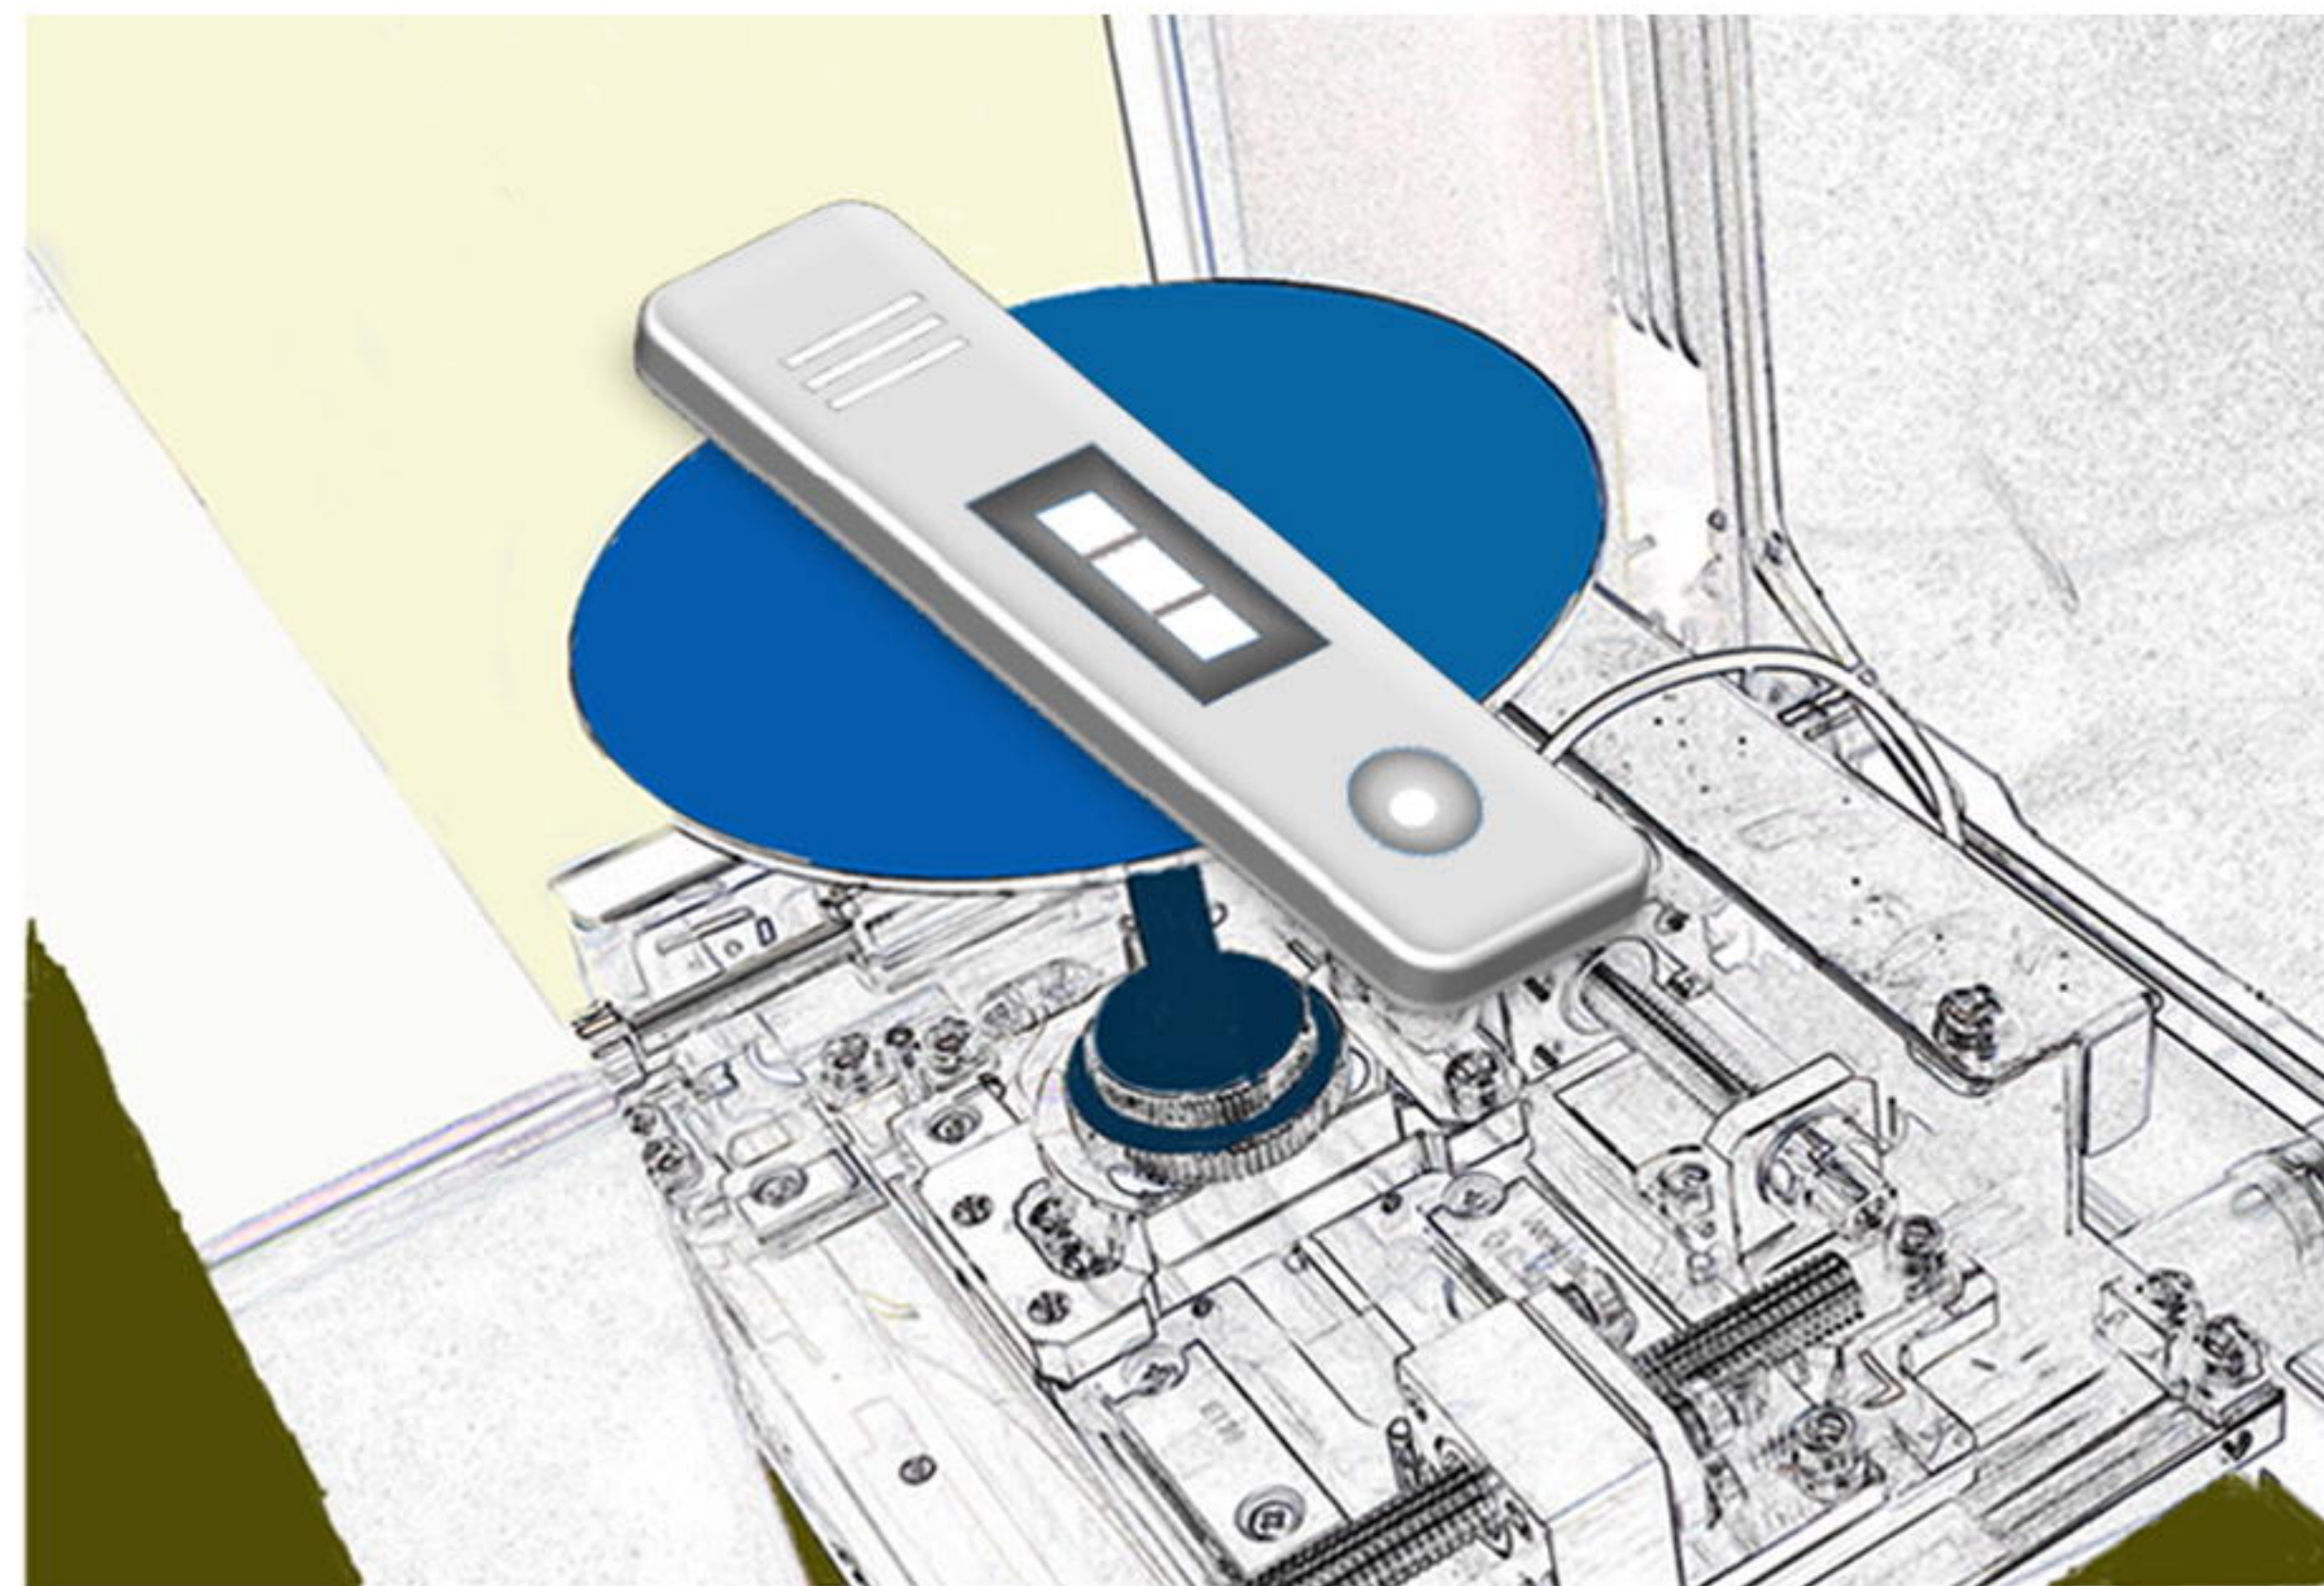**D**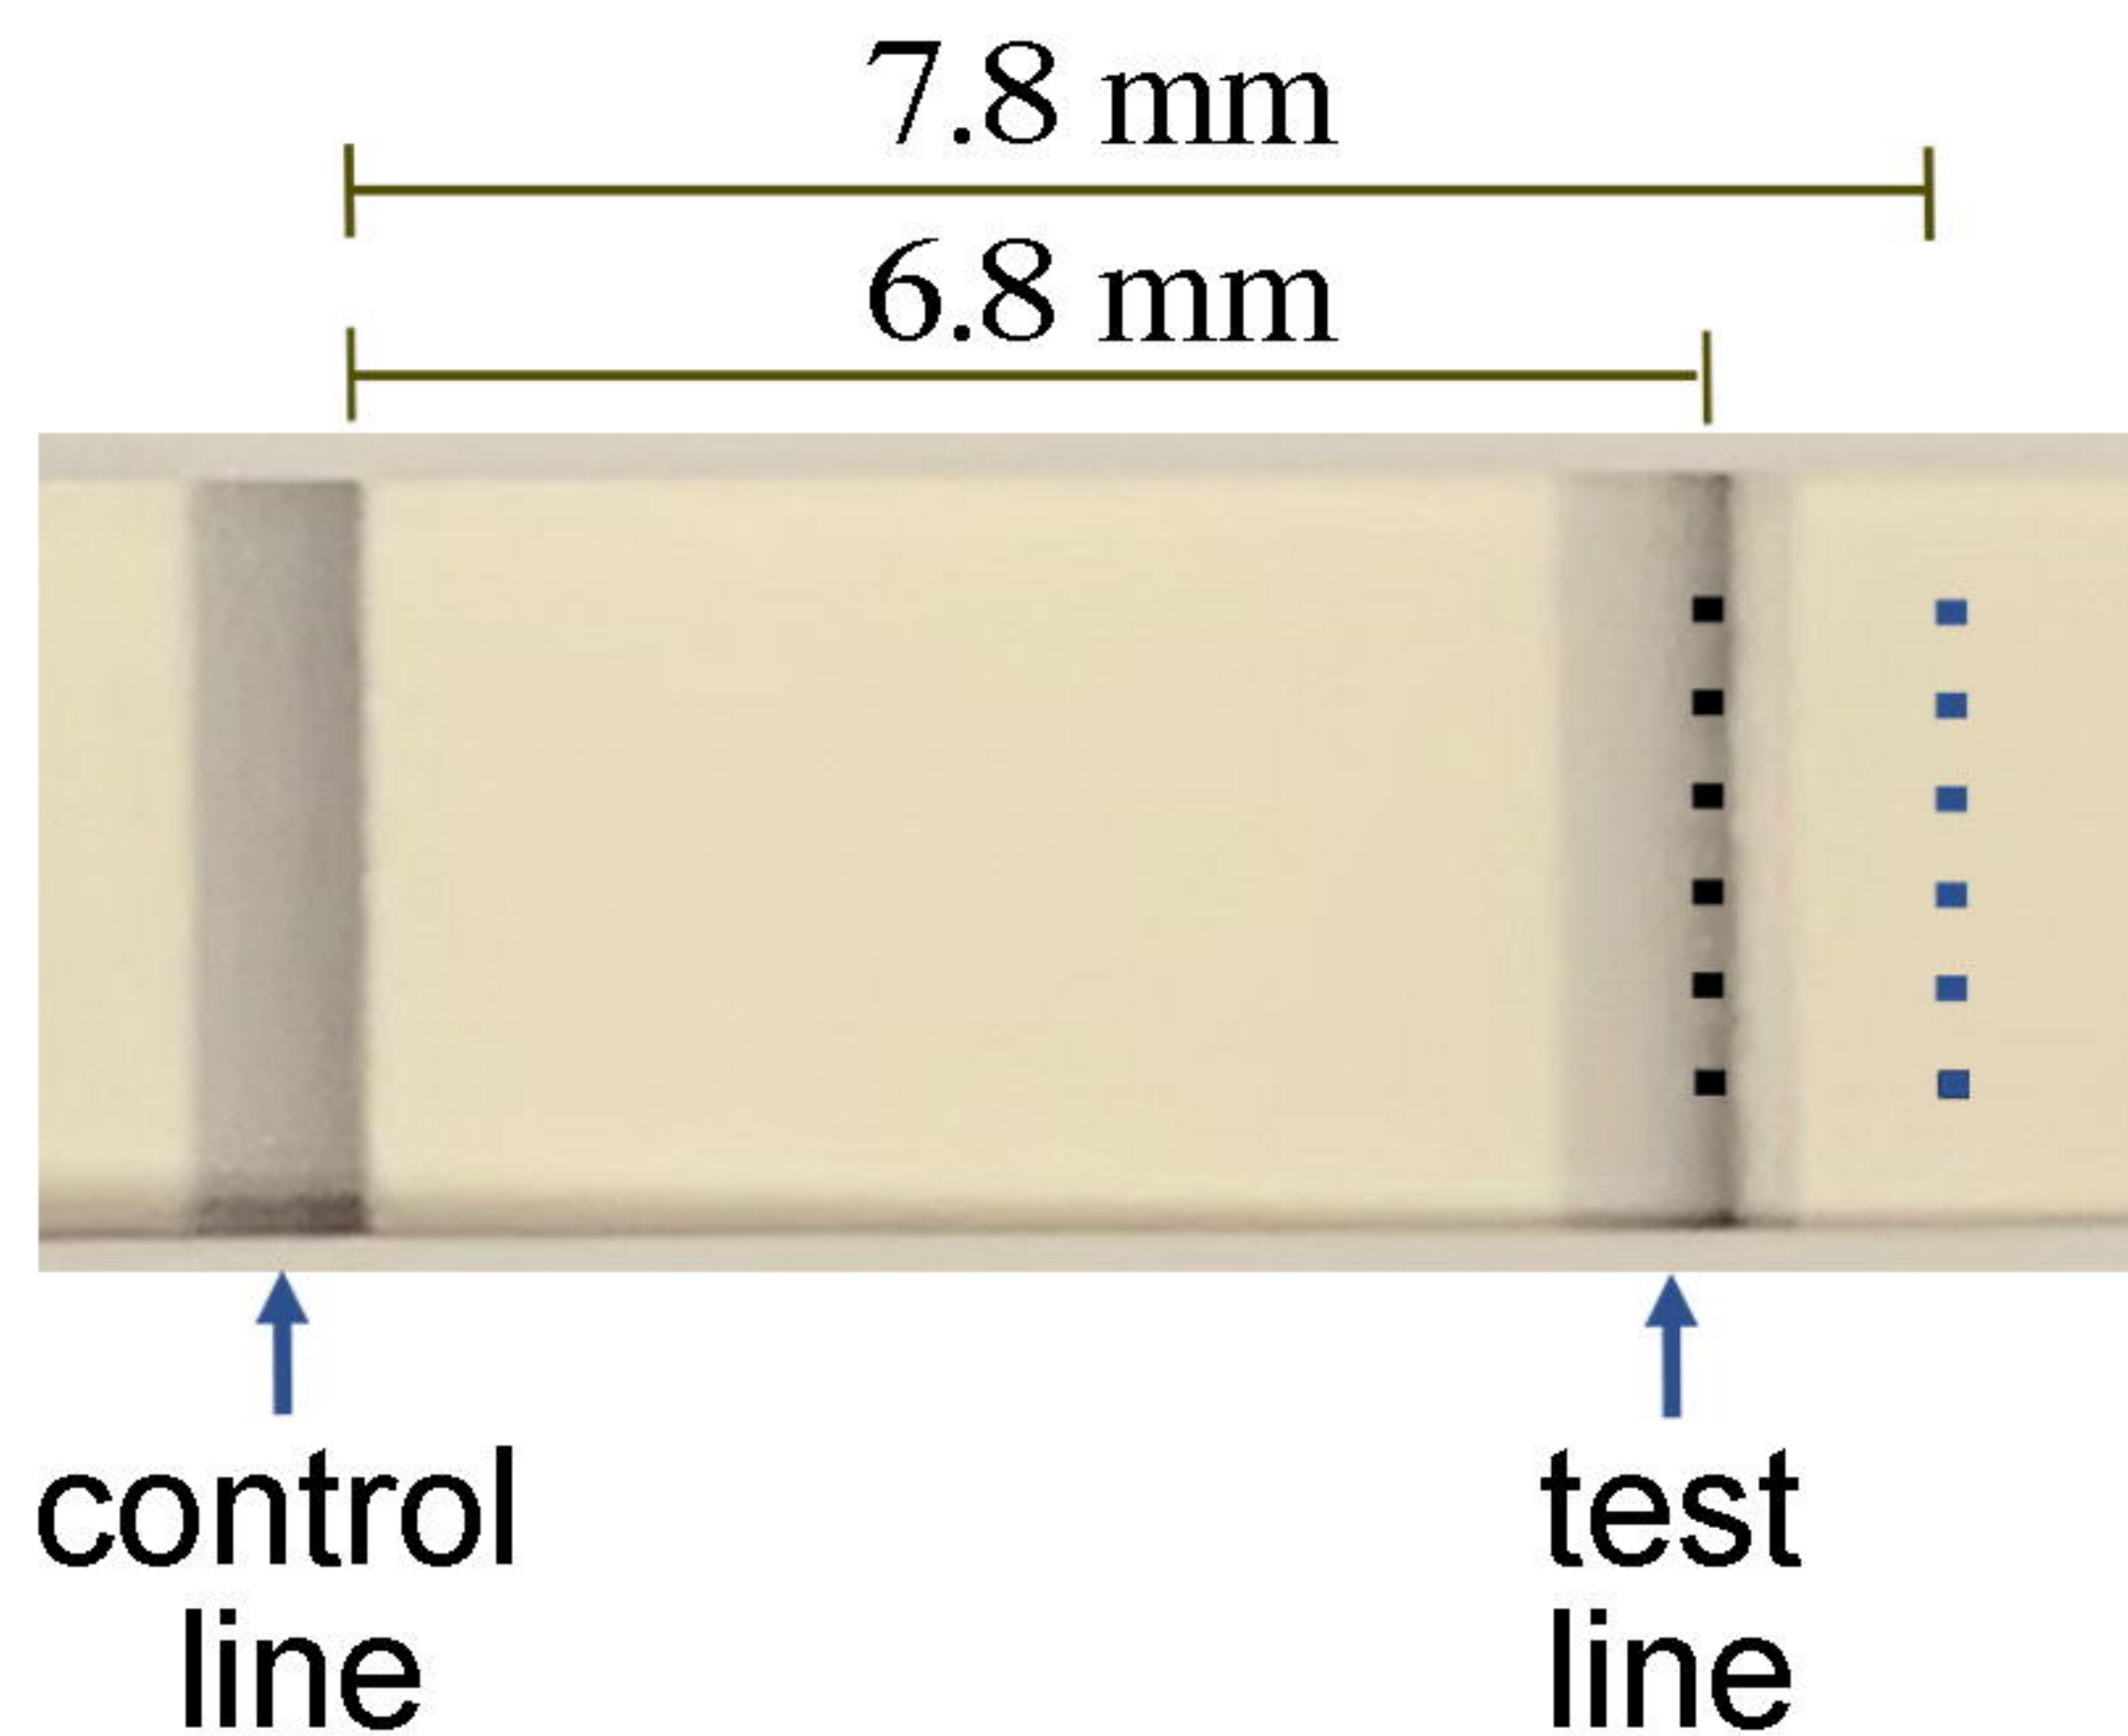

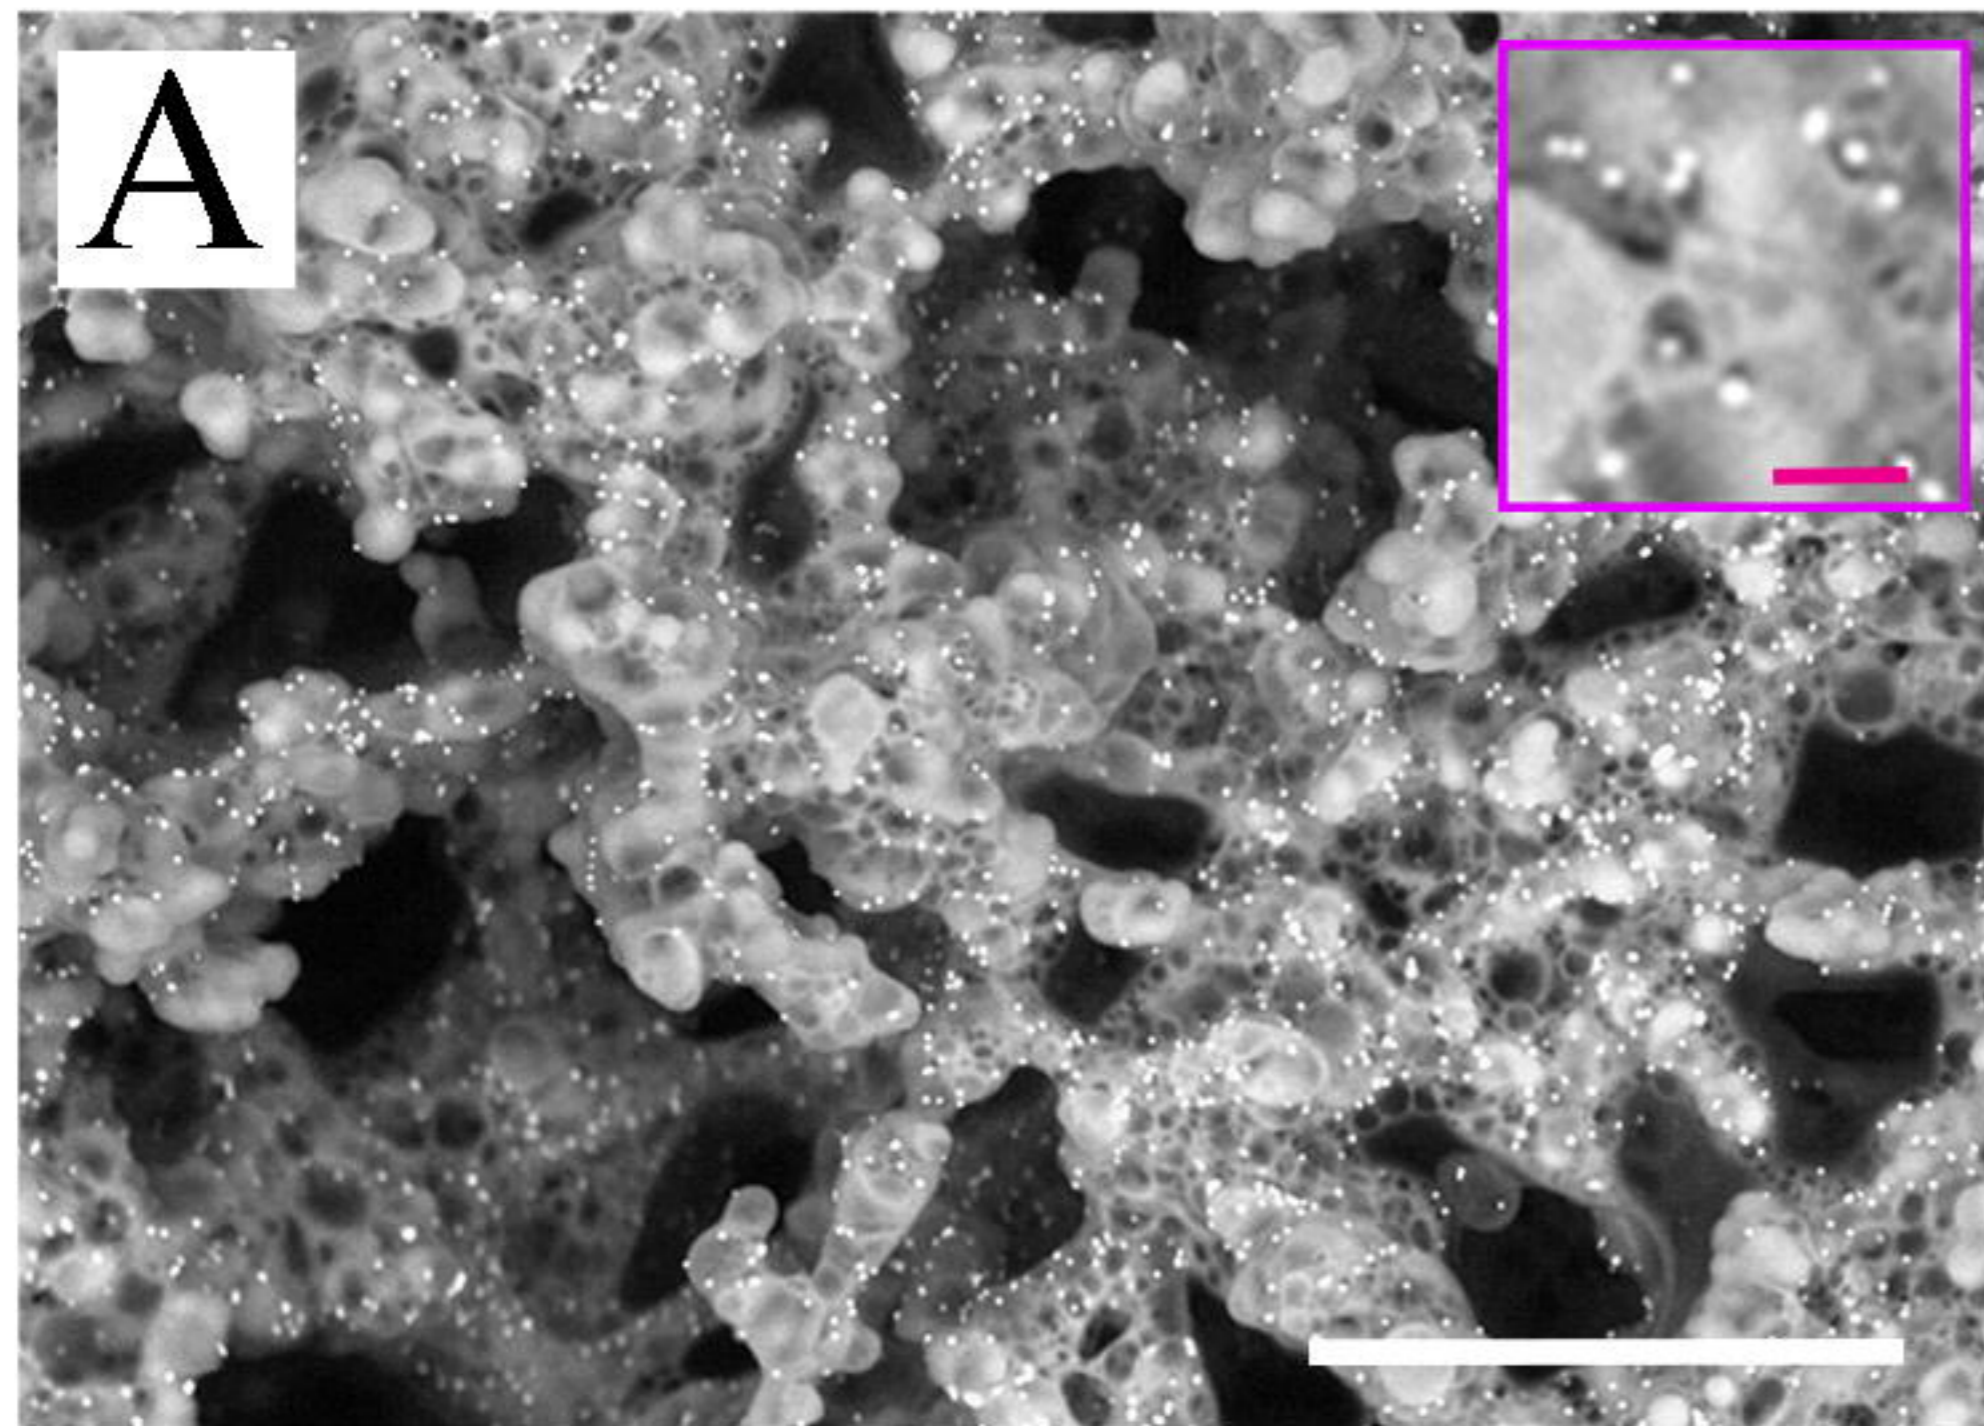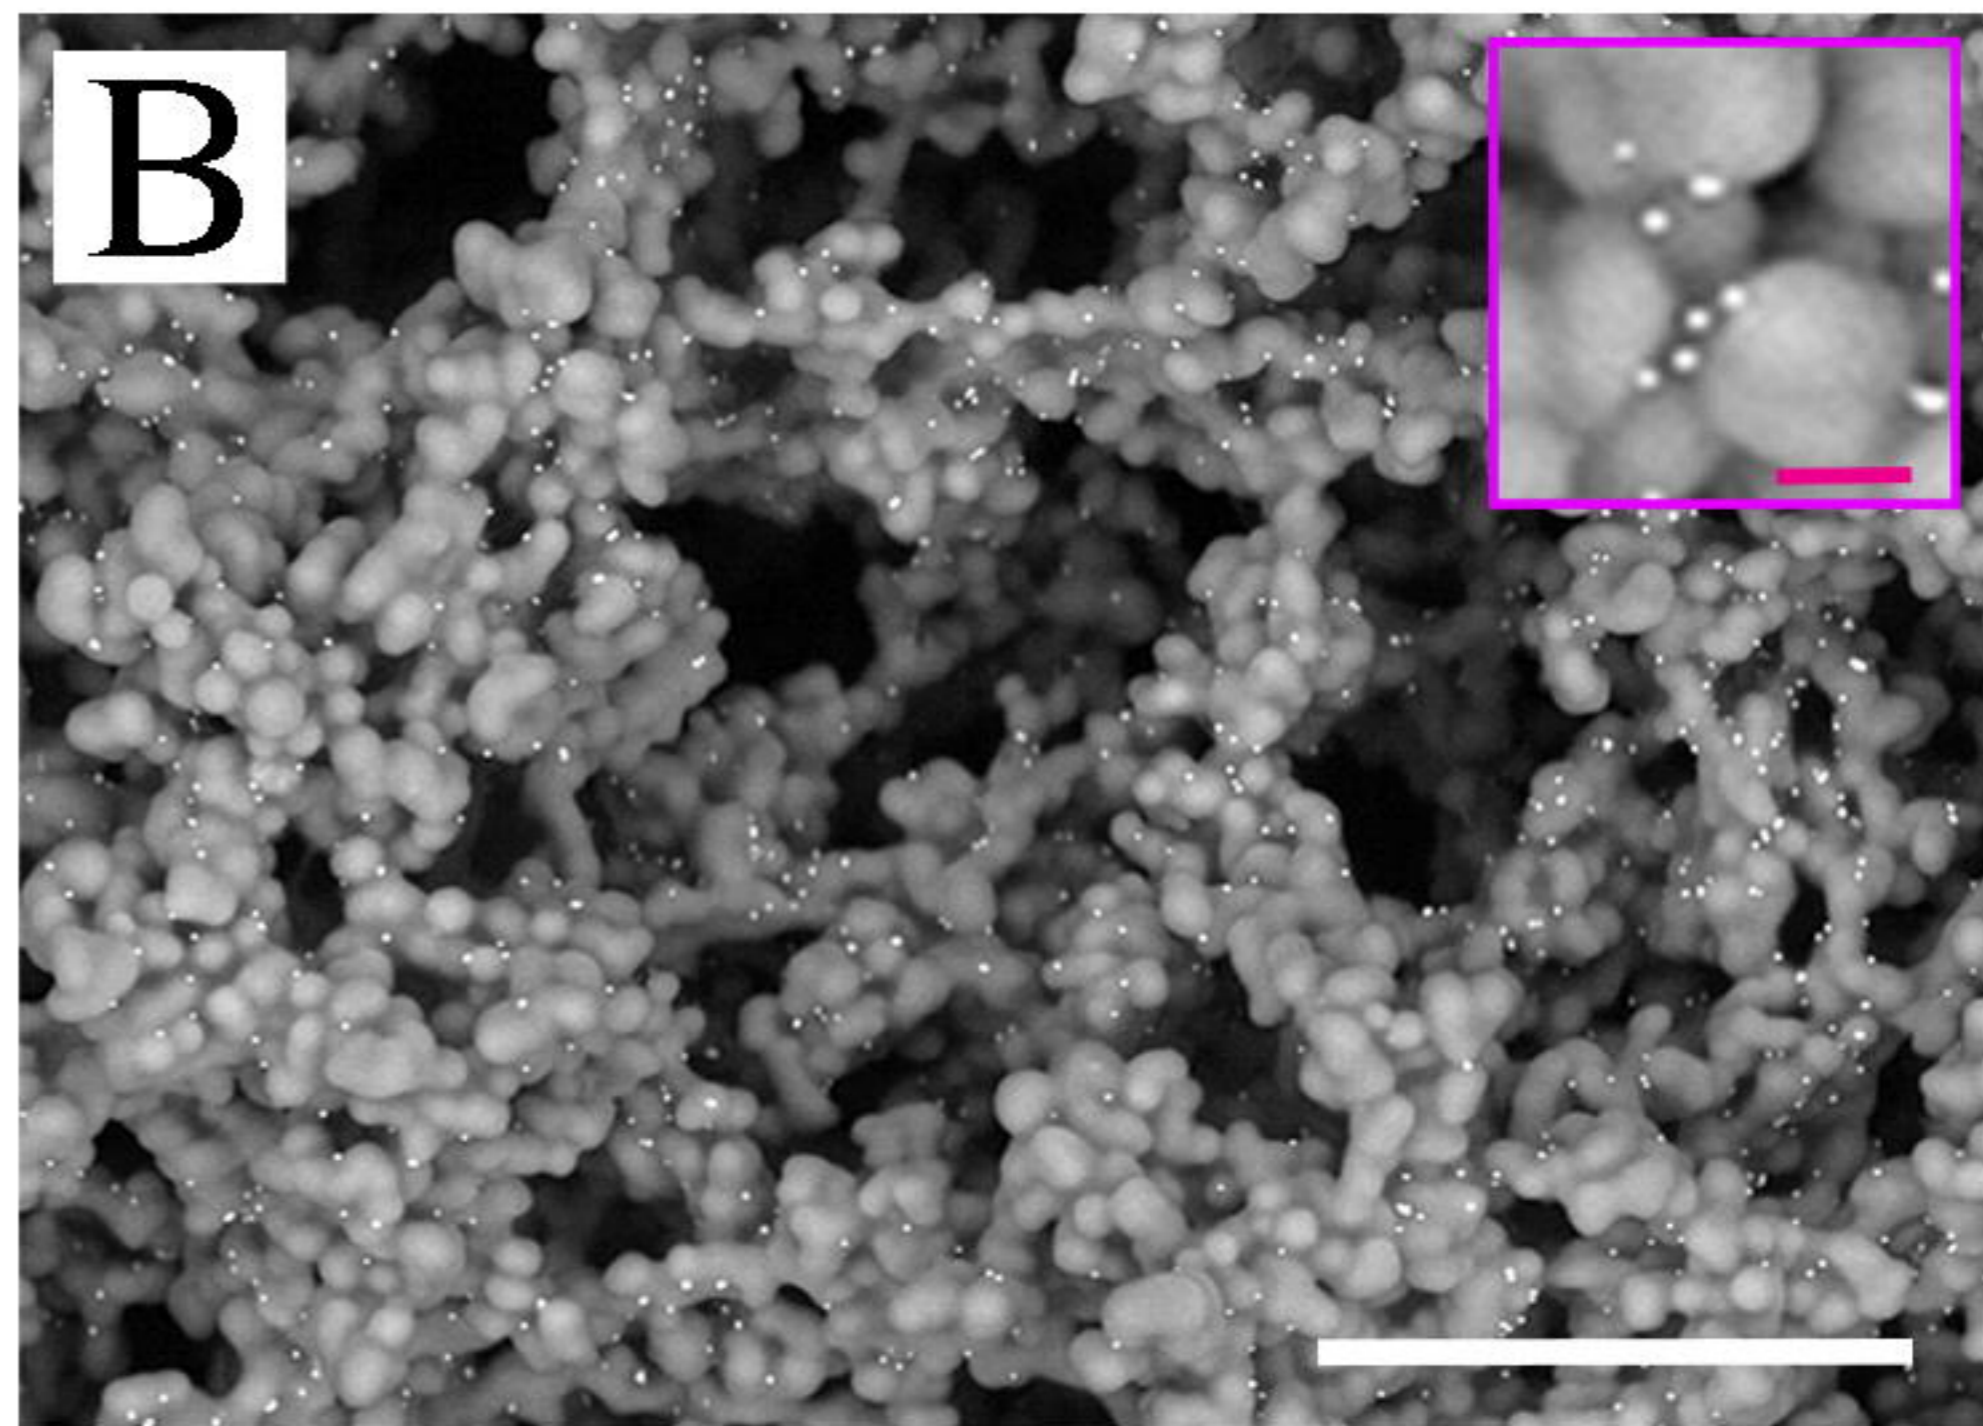

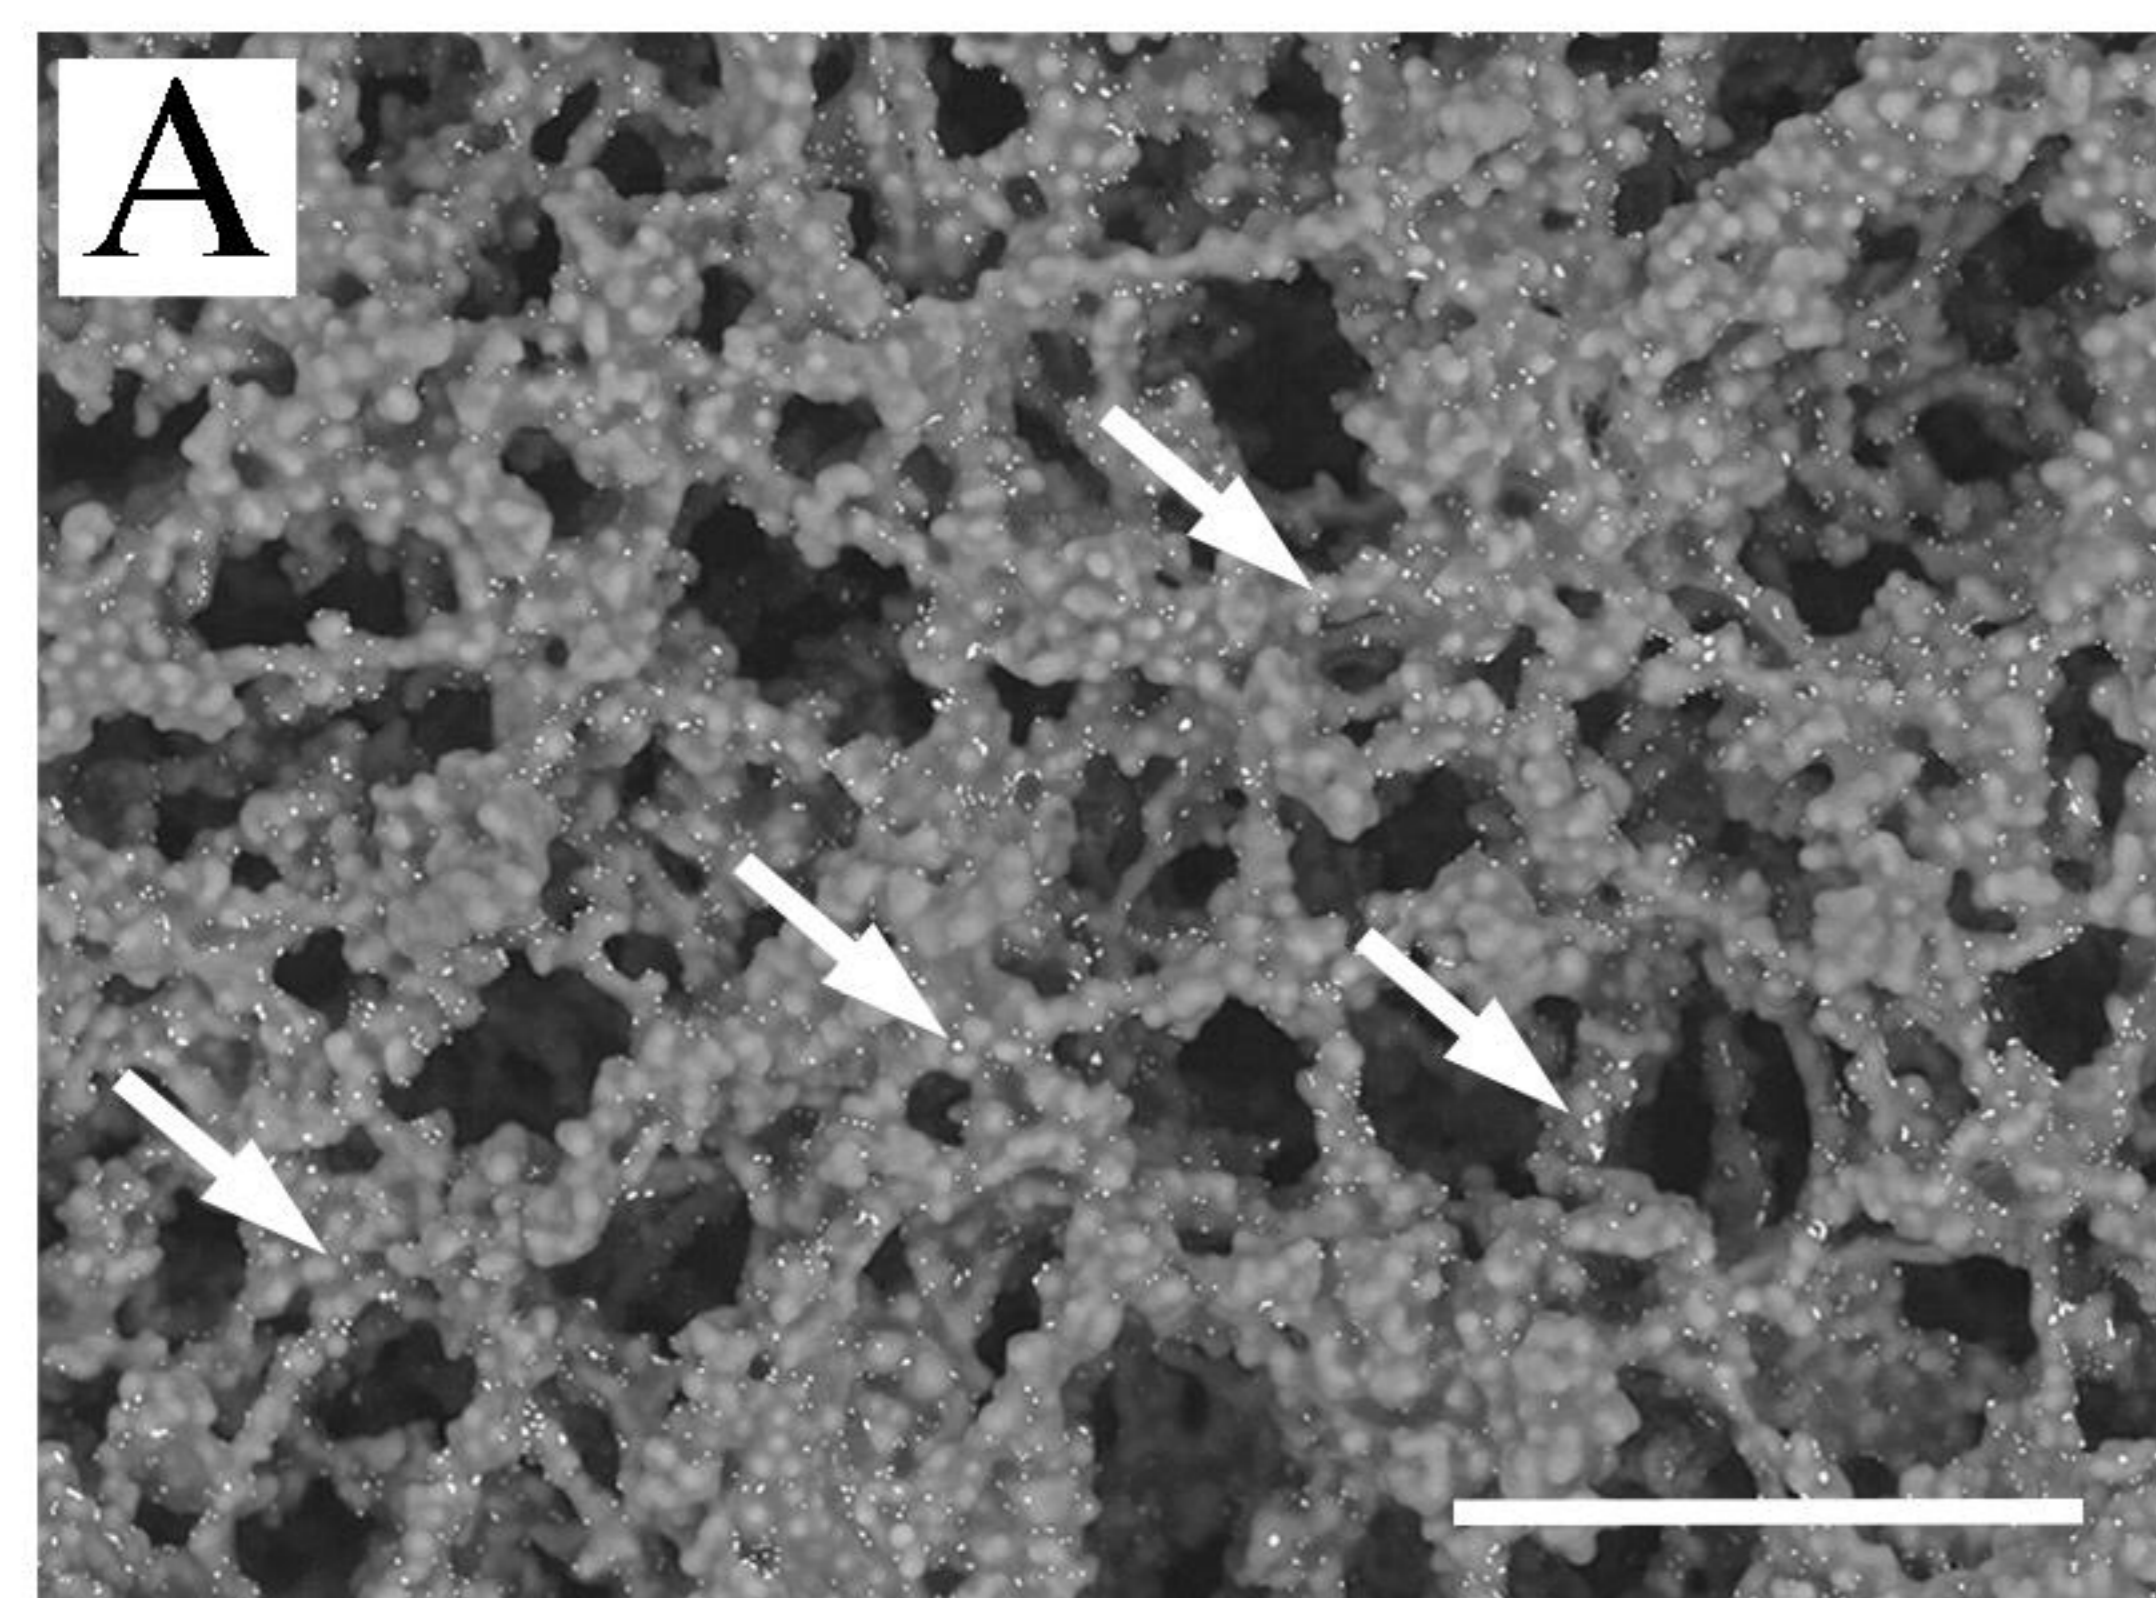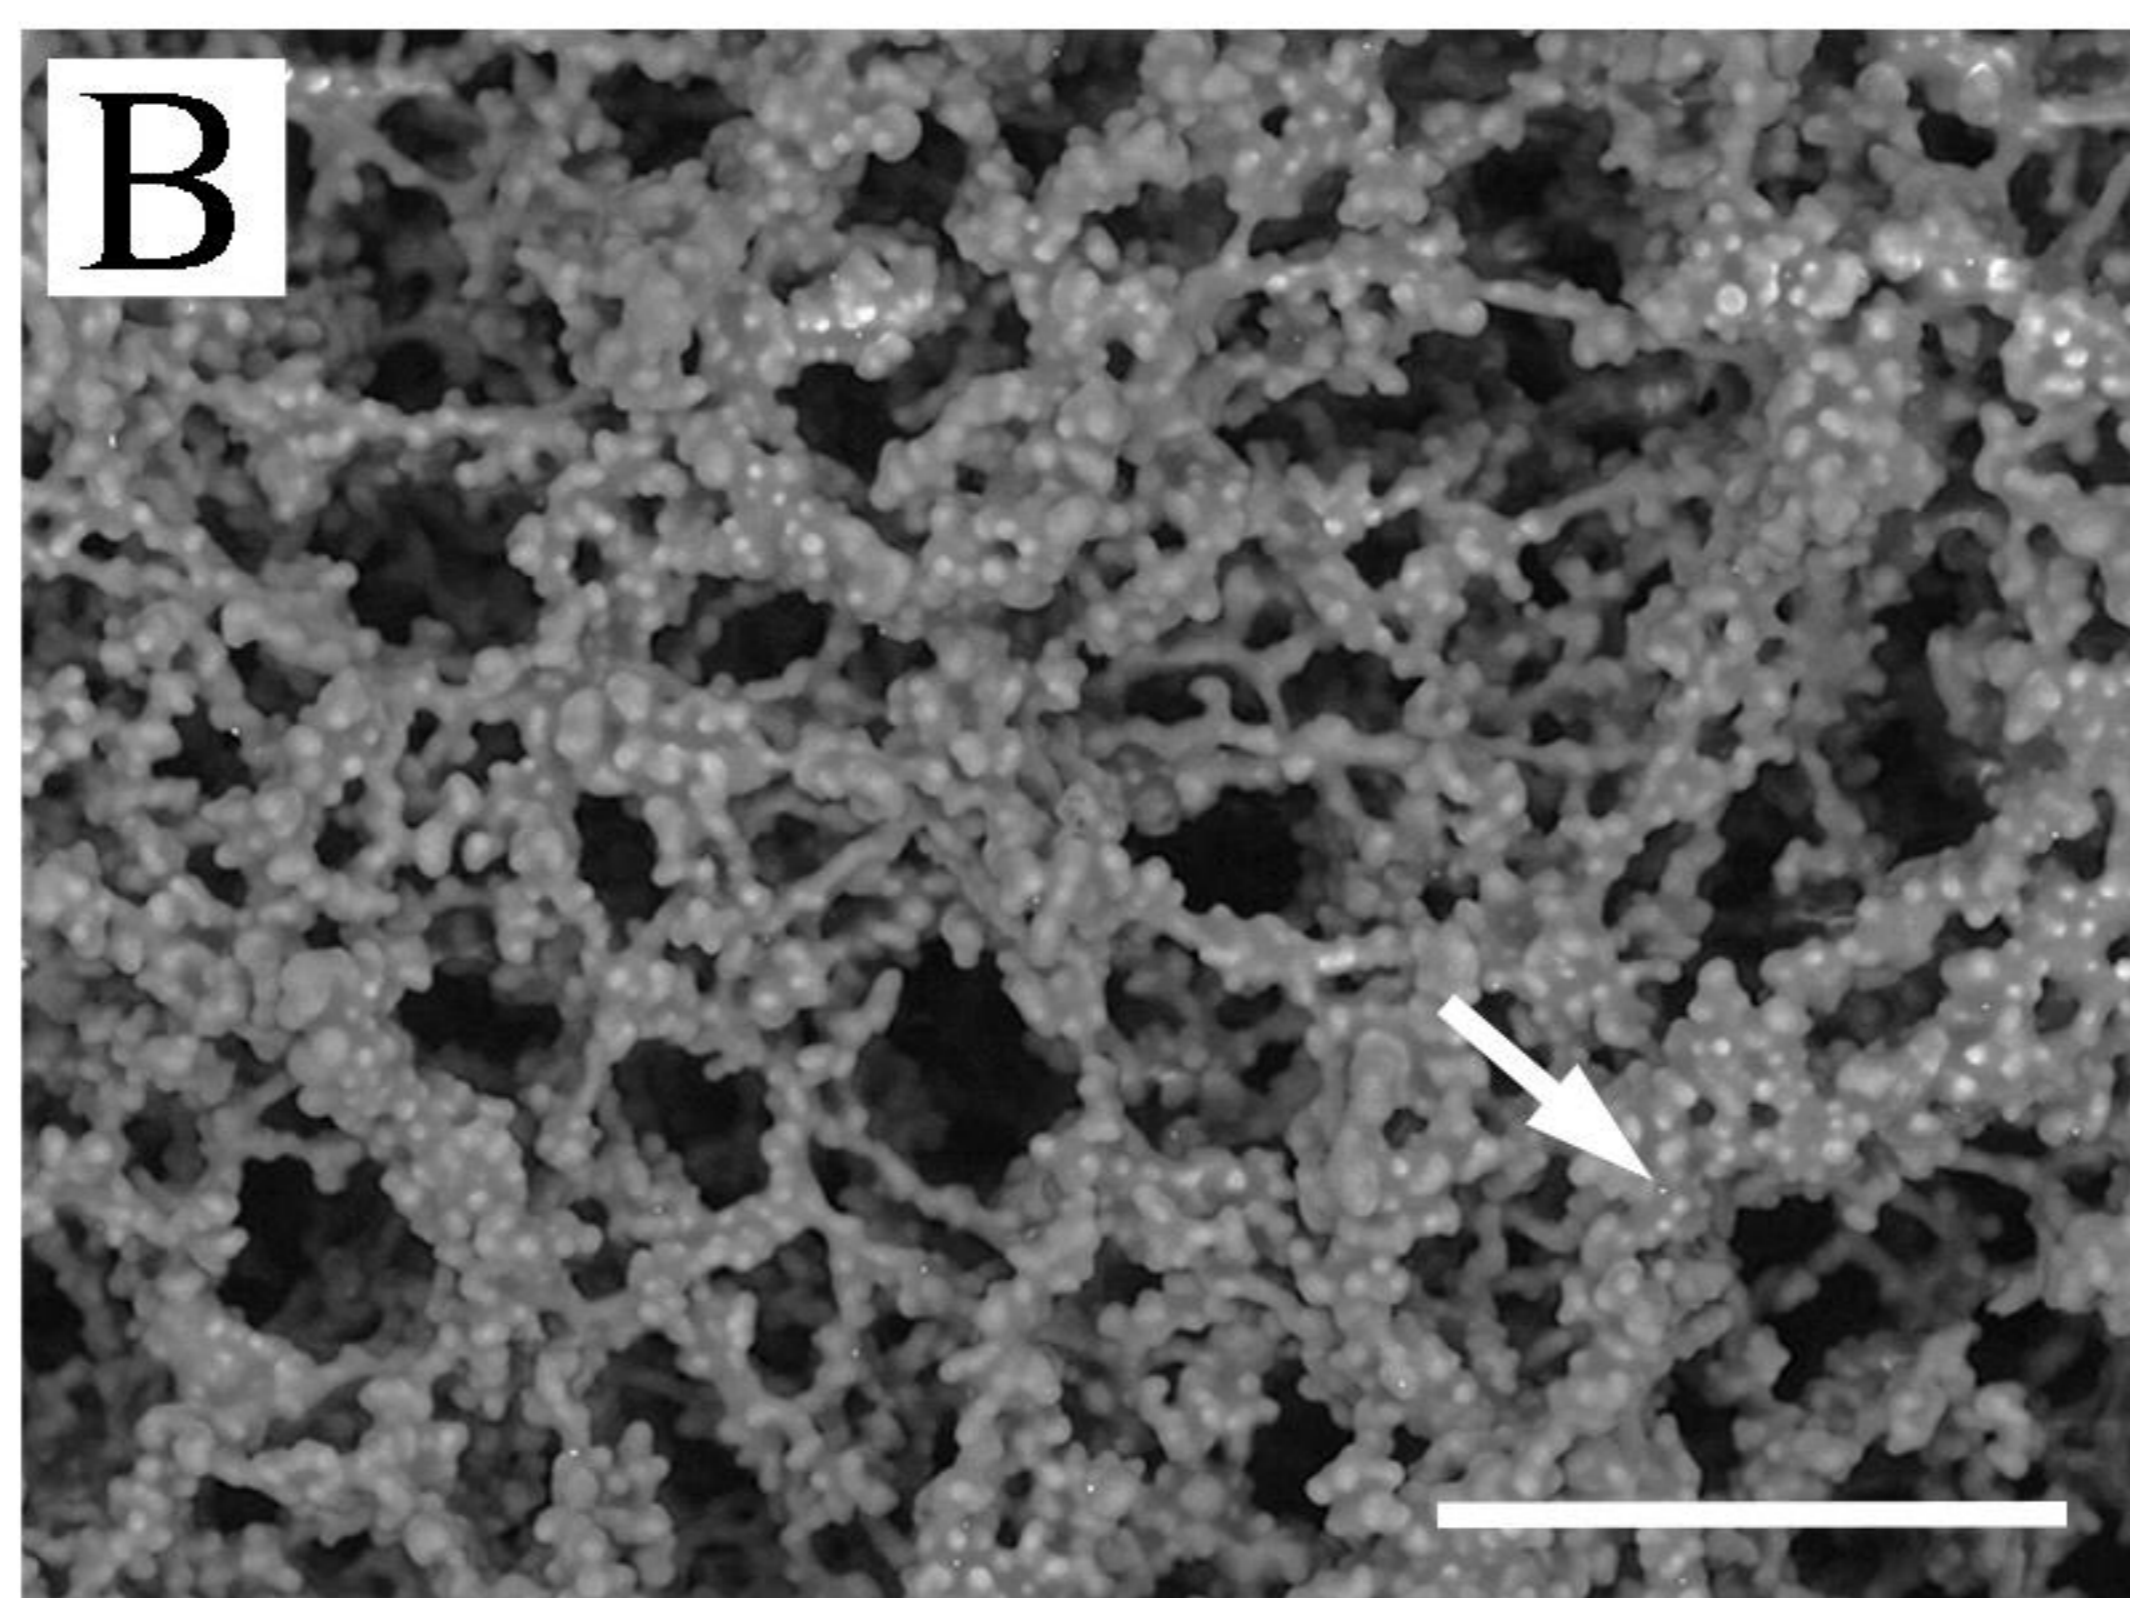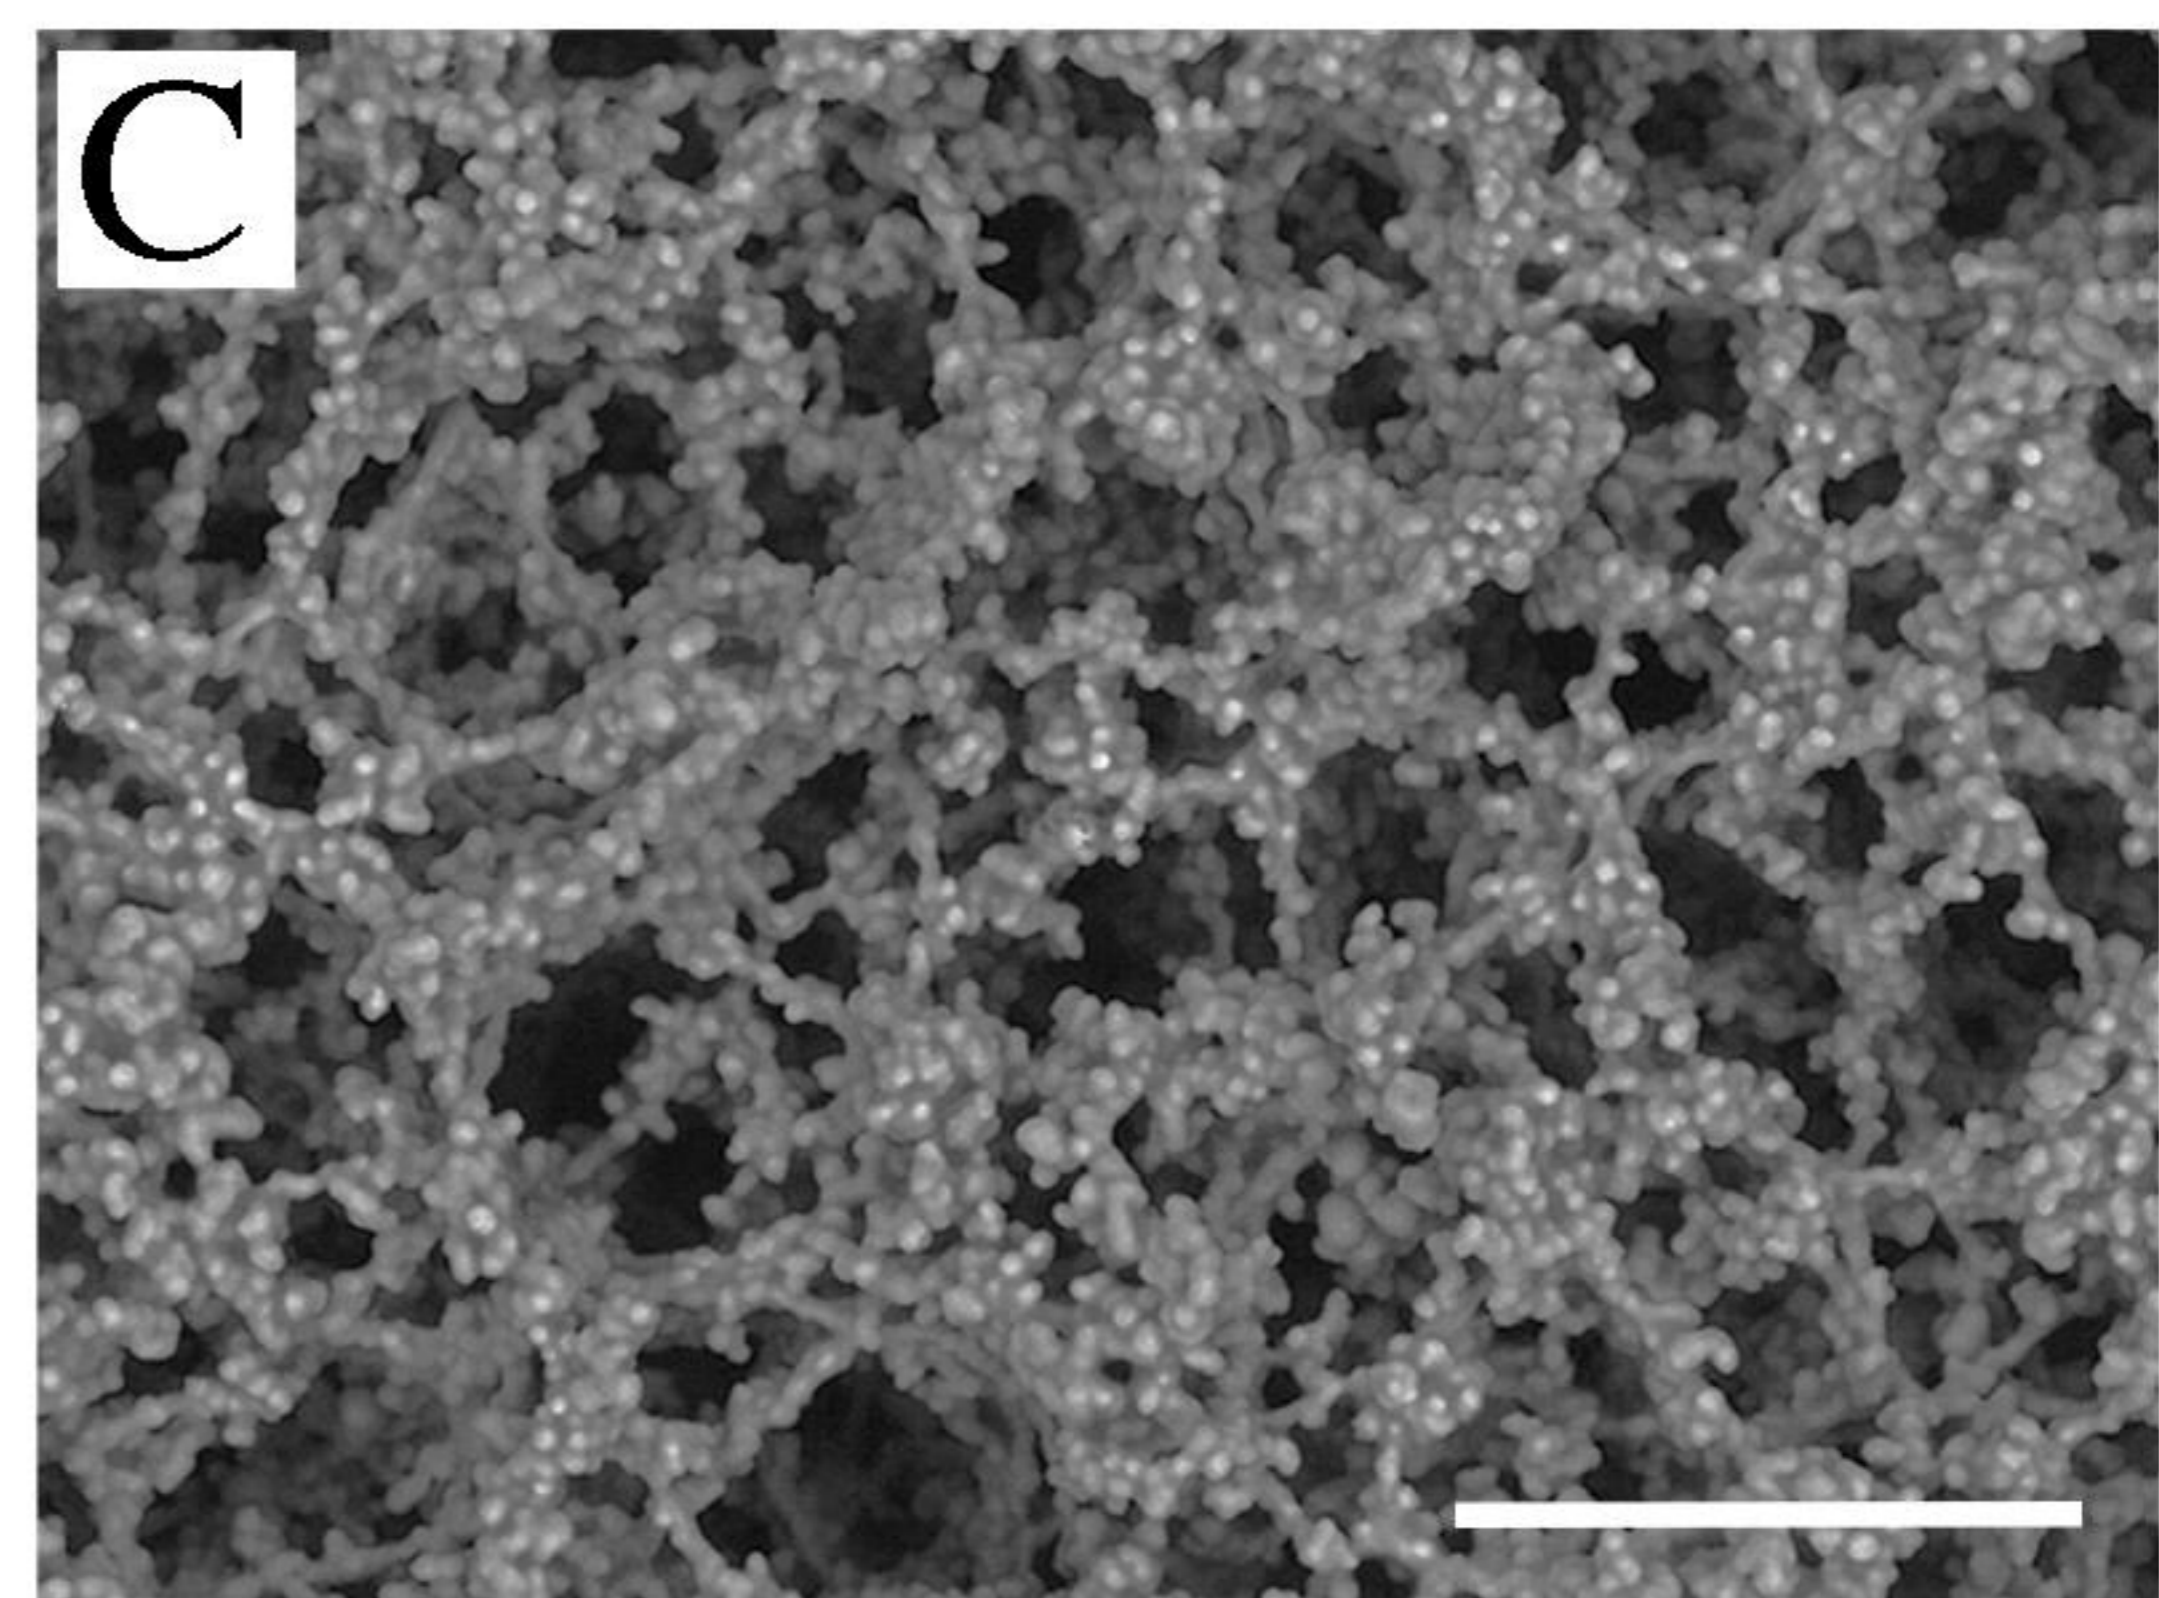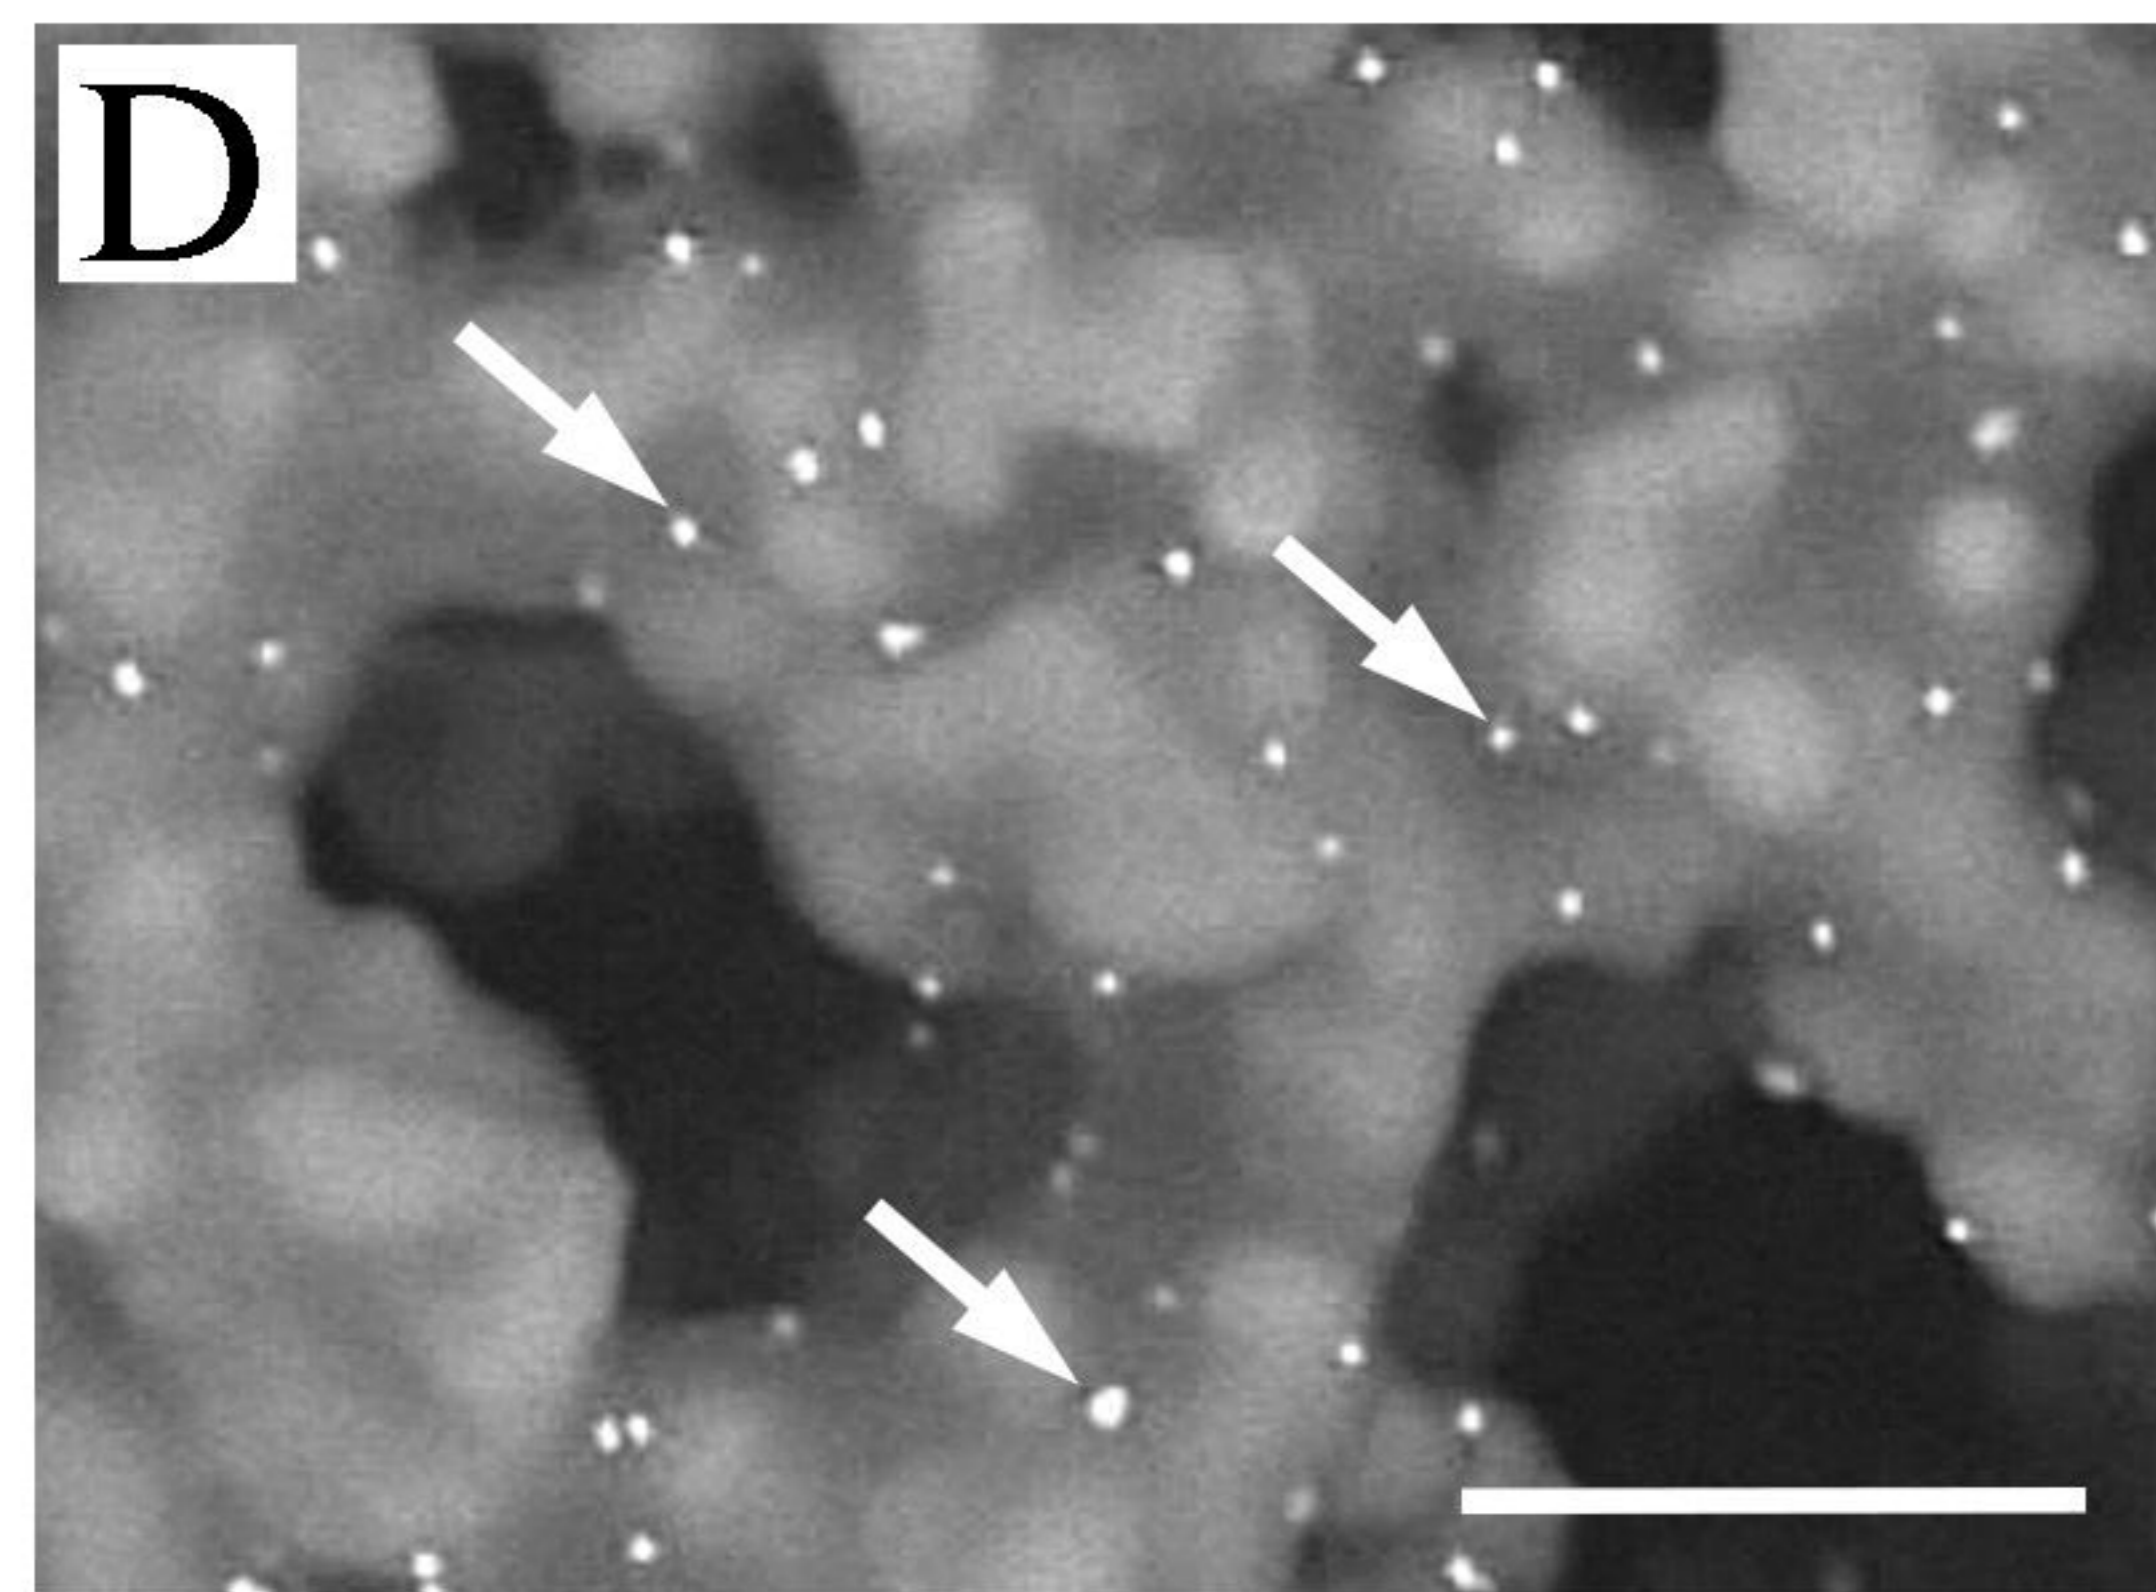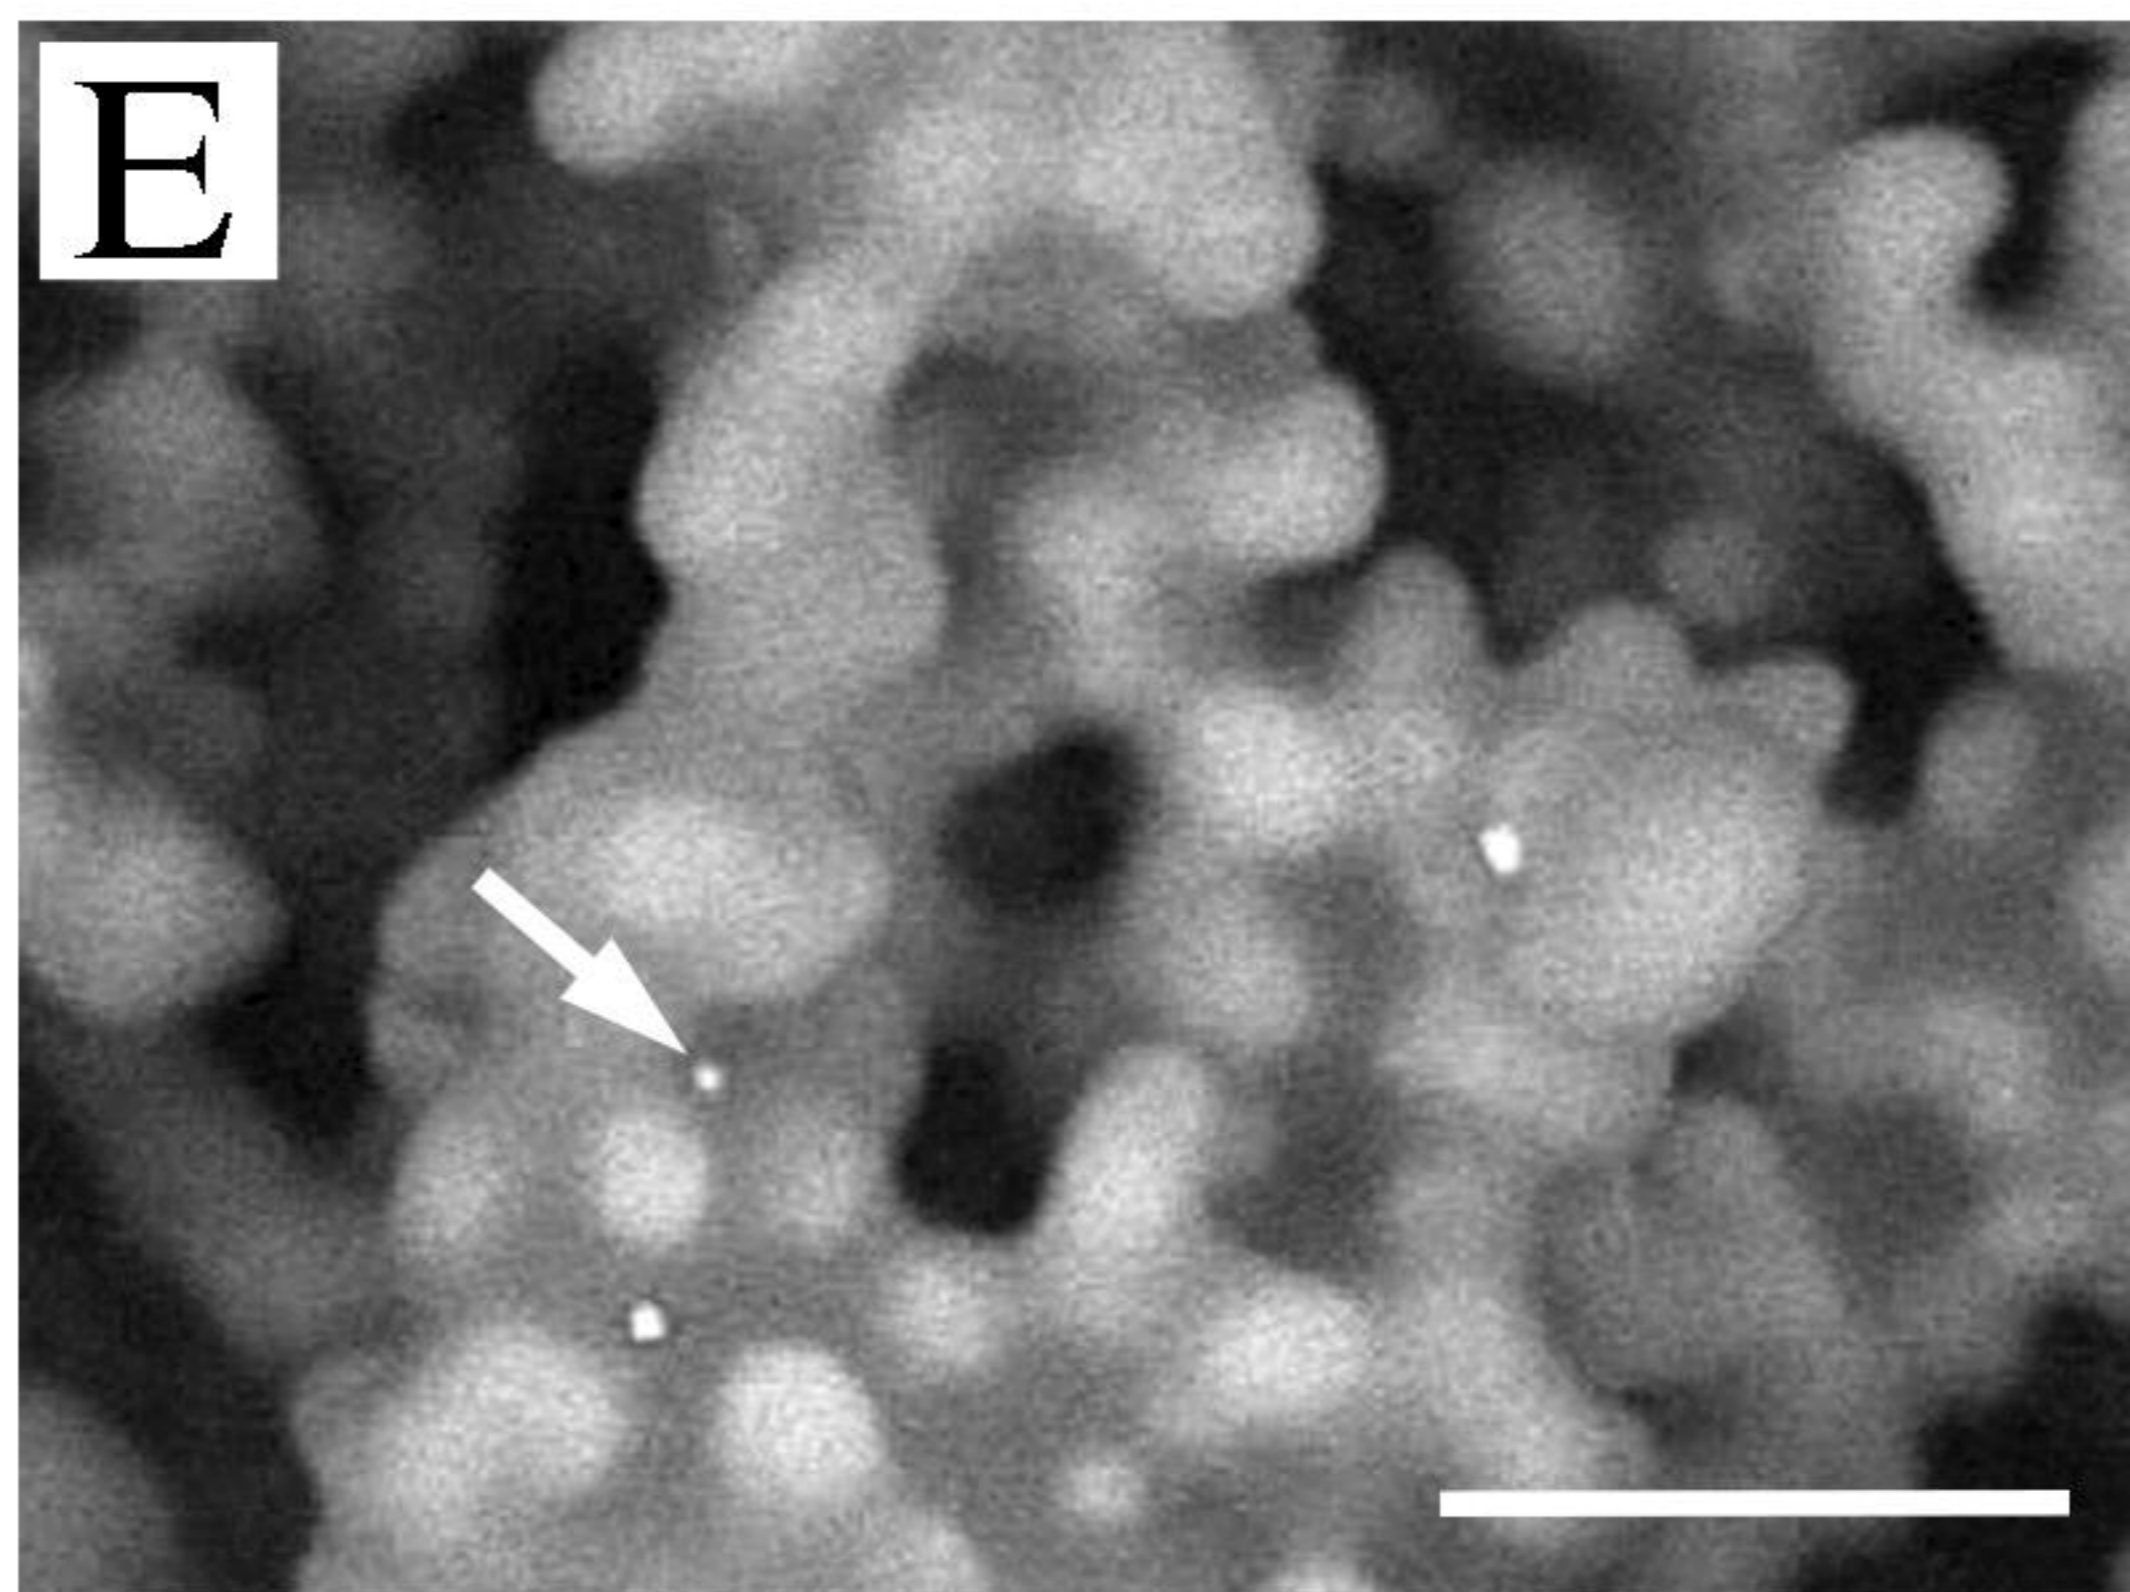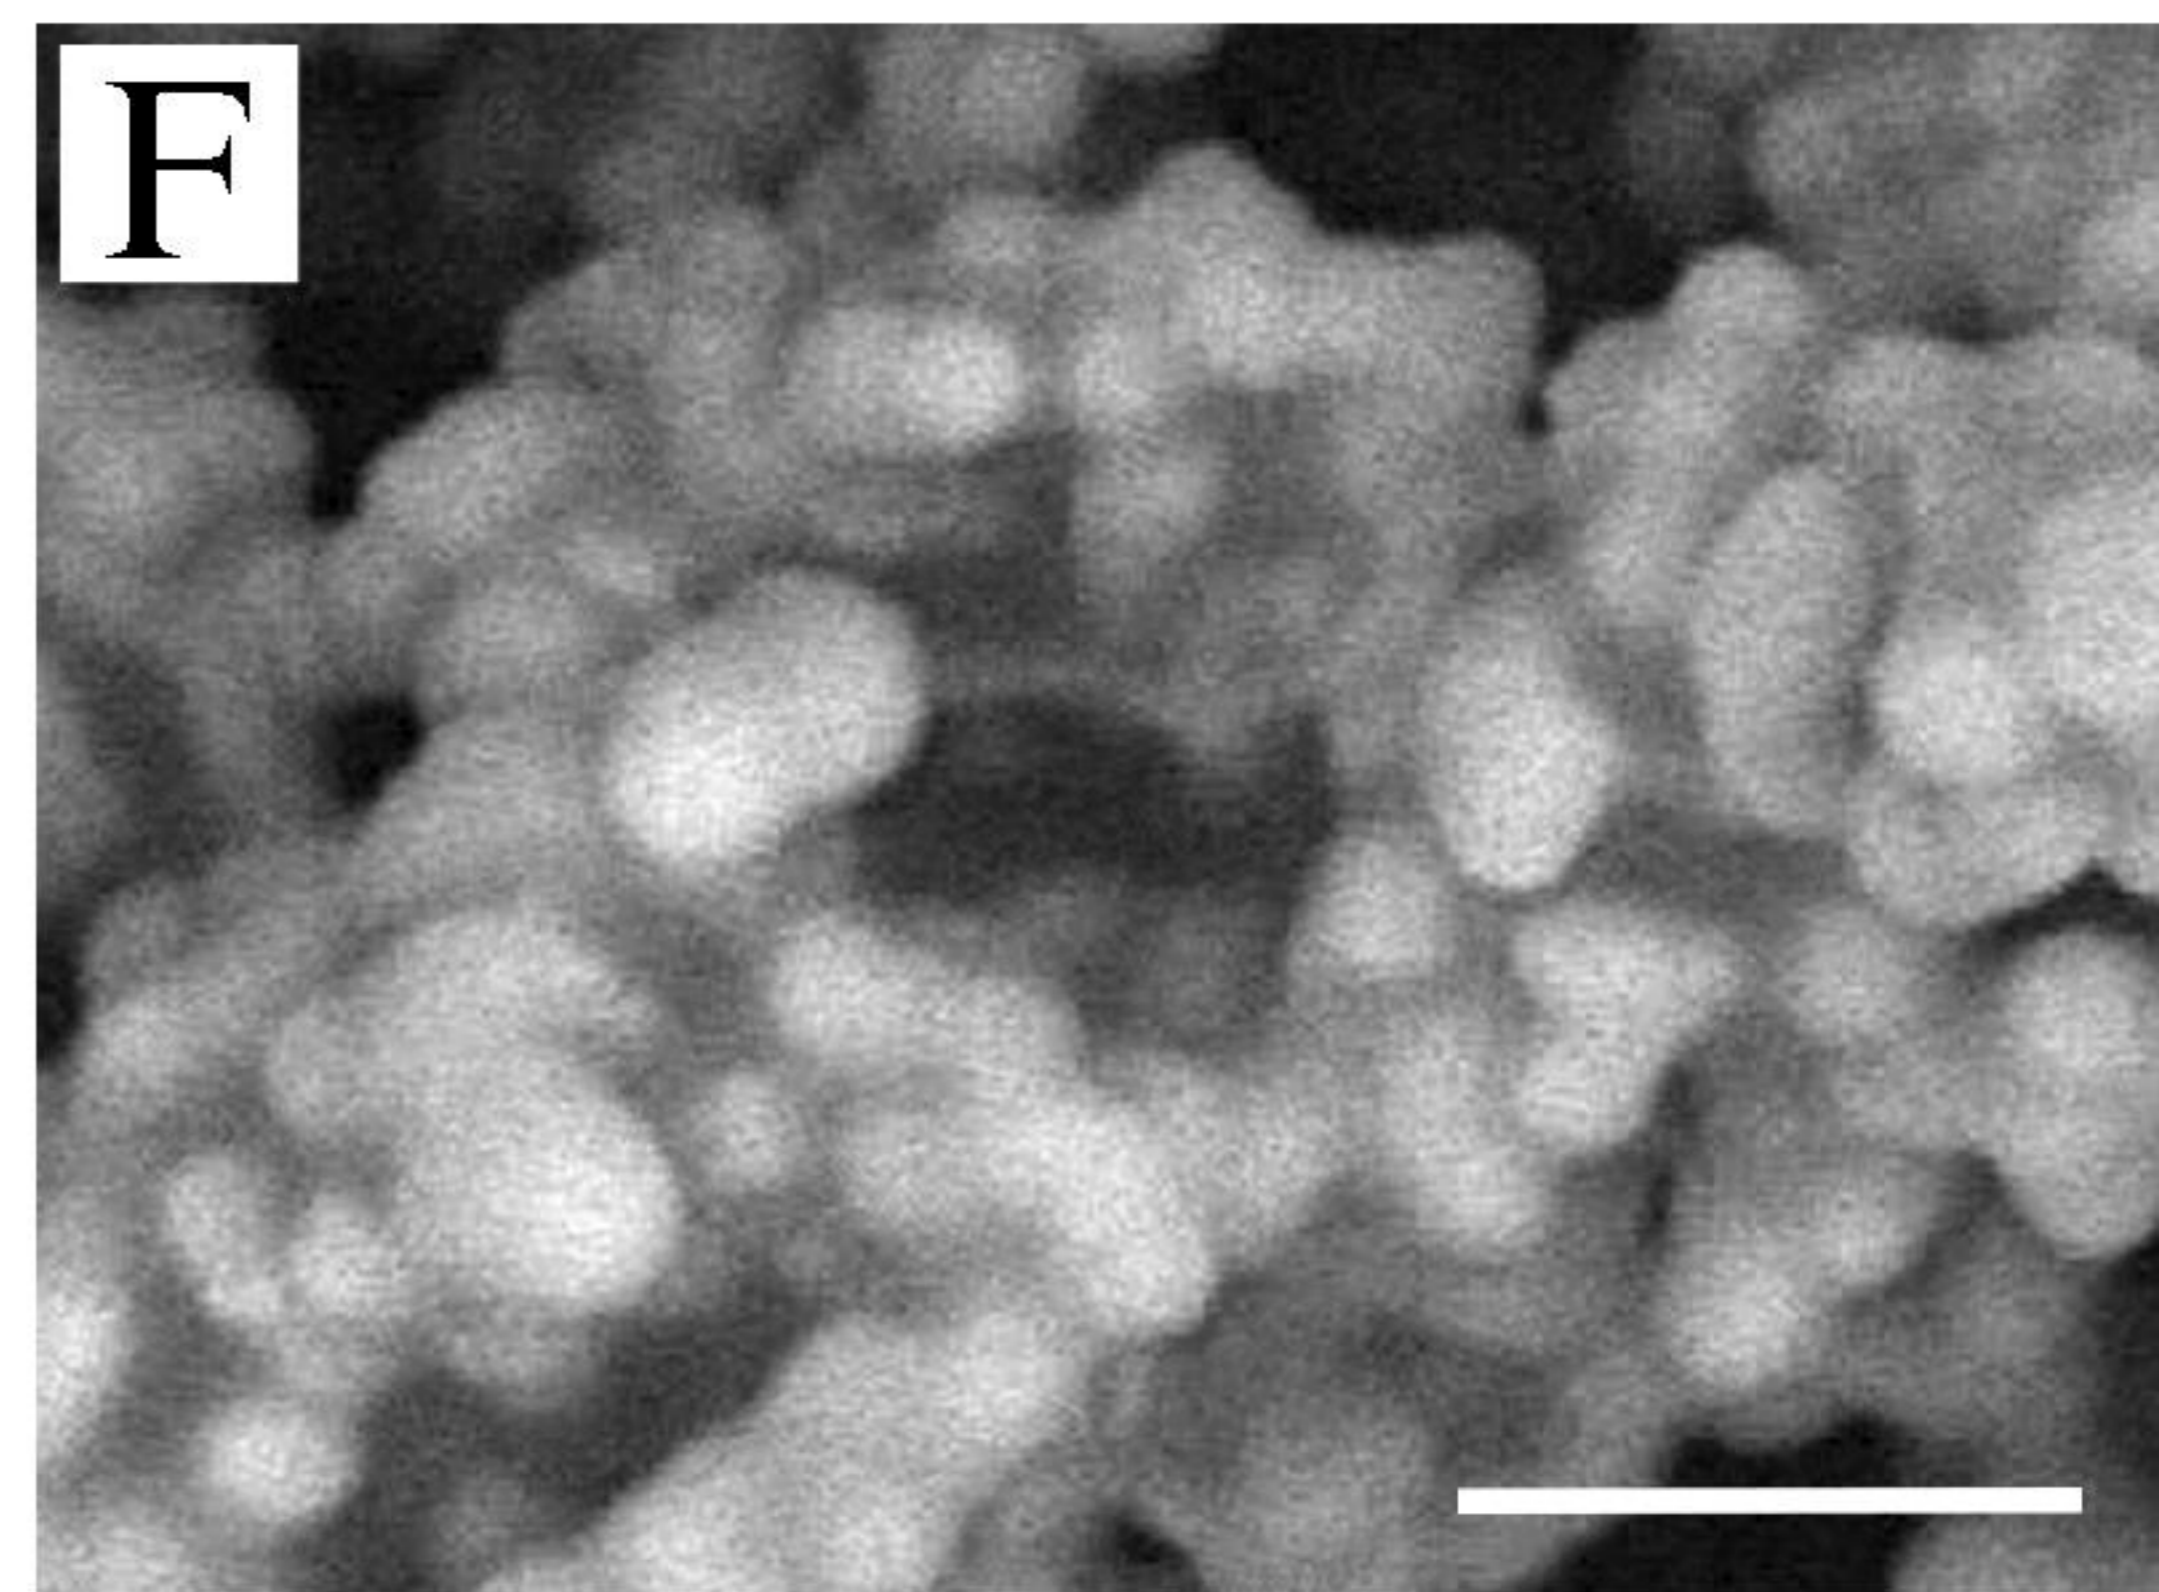

# Scatter plot of Ct and particle counts/field

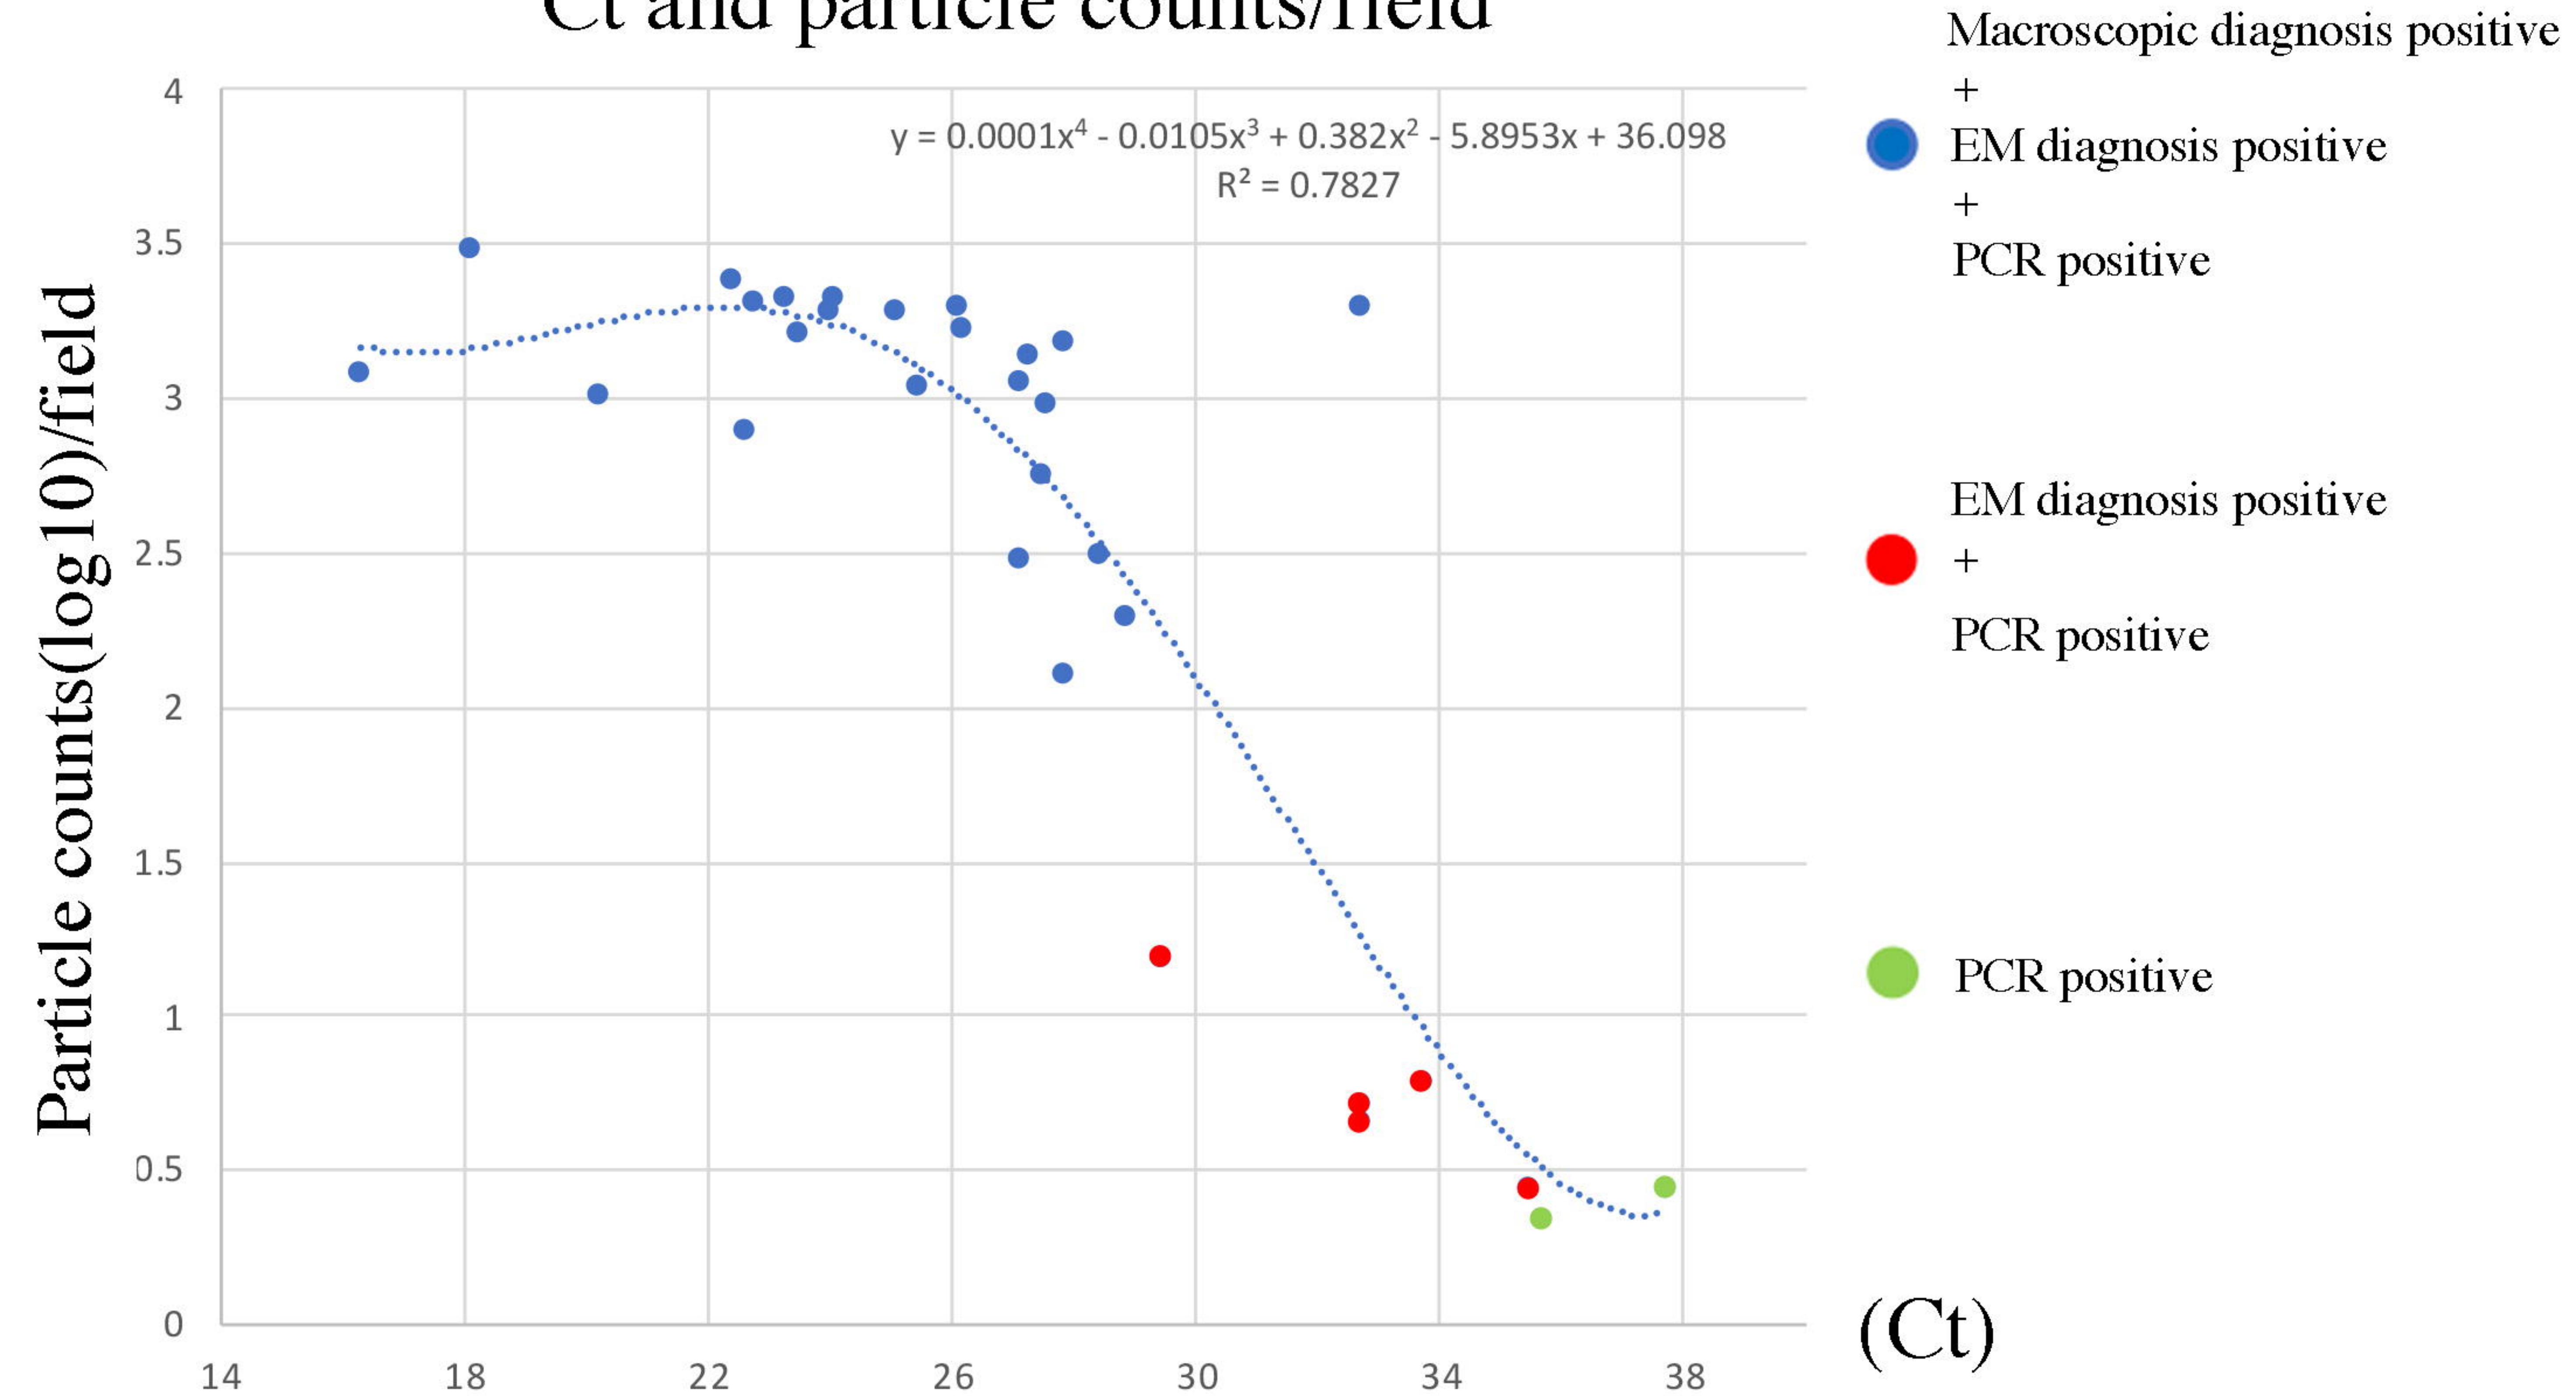

| Influenza A<br>rRT-PCR | Ct                       | Macroscopic diagnosis |                | Electron microscopic diagnosis |                |
|------------------------|--------------------------|-----------------------|----------------|--------------------------------|----------------|
|                        |                          | Sensitivity           | Specificity    | Sensitivity                    | Specificity    |
| Positive<br>(n=31)     | $14.0 \leq Ct < 22.0$    | 100% (3/3)            |                | 100% (3/3)                     |                |
|                        | $22.0 \leq Ct < 30.0$    | 95.2% (20/21)         |                | 100% (21/21)                   |                |
|                        | $30.0 \leq Ct \leq 38.0$ | 14.3% (1/7)           |                | 71.4% (5/7)                    |                |
|                        | $14.0 \leq Ct \leq 38.0$ | 77.4% (24/31)         |                | 93.5% (29/31)                  |                |
| Negative<br>(n=166)    | $Ct > 38.0$              |                       | 100% (166/166) |                                | 100% (166/166) |



|                        |          | Macroscopic diagnosis |          |              | Electron microscopic diagnosis |          |              |
|------------------------|----------|-----------------------|----------|--------------|--------------------------------|----------|--------------|
|                        |          | positive              | negative | Row Marginal | positive                       | negative | Row Marginal |
| Influenza A<br>rRT-PCR | Positive | 24                    | 7        | 31           | 29                             | 2        | 31           |
|                        | Negative | 0                     | 166      | 166          | 0                              | 166      | 166          |
| Column Marginal        |          | 24                    | 172      | 197          | 29                             | 168      | 197          |
| % Agreement(kappa)     |          | 0.96: $24+166/197$    |          |              | 0.99: $29+166/197$             |          |              |
